# Supplementary material for: Short-term abstinence from alcohol and changes in cardiovascular risk factors, liver function tests and cancer-related growth factors: a prospective observational study
Source: PubMed Central journal article supplement — BMJ Open. 2018 May 5;8(5):e020673. doi: 10.1136/bmjopen-2017-020673 (PMC5942469; doi:10.1136/bmjopen-2017-020673), 2018-05-05
Supplement: bmjopen-2017-020673.draft_revisions.pdf [file bmjopen-2017-020673.draft_revisions.pdf]

# BMJ Open

BMJ Open is committed to open peer review. As part of this commitment we make the peer review history of every article we publish publicly available.

When an article is published we post the peer reviewers' comments and the authors' responses online. We also post the versions of the paper that were used during peer review. These are the versions that the peer review comments apply to.

The versions of the paper that follow are the versions that were submitted during the peer review process. They are not the versions of record or the final published versions. They should not be cited or distributed as the published version of this manuscript.

BMJ Open is an open access journal and the full, final, typeset and author-corrected version of record of the manuscript is available on our site with no access controls, subscription charges or pay-per-view fees (<http://bmjopen.bmj.com>).

If you have any questions on BMJ Open's open peer review process please email [info.bmjopen@bmj.com](mailto:info.bmjopen@bmj.com)

# BMJ Open

## The Effect of Alcohol Consumption on Cardiovascular Risk Factors, Liver Function Tests and Cancer-Related Growth Factors

|                                 |                                                                                                                                                                                                                                                                                                                                                                                                                                                                                                                                                                                                                                                                                                                                                                                                                                                                                                                                                                                                                                                                                                                                                                  |
|---------------------------------|------------------------------------------------------------------------------------------------------------------------------------------------------------------------------------------------------------------------------------------------------------------------------------------------------------------------------------------------------------------------------------------------------------------------------------------------------------------------------------------------------------------------------------------------------------------------------------------------------------------------------------------------------------------------------------------------------------------------------------------------------------------------------------------------------------------------------------------------------------------------------------------------------------------------------------------------------------------------------------------------------------------------------------------------------------------------------------------------------------------------------------------------------------------|
| Journal:                        | <i>BMJ Open</i>                                                                                                                                                                                                                                                                                                                                                                                                                                                                                                                                                                                                                                                                                                                                                                                                                                                                                                                                                                                                                                                                                                                                                  |
| Manuscript ID                   | bmjopen-2017-020673                                                                                                                                                                                                                                                                                                                                                                                                                                                                                                                                                                                                                                                                                                                                                                                                                                                                                                                                                                                                                                                                                                                                              |
| Article Type:                   | Research                                                                                                                                                                                                                                                                                                                                                                                                                                                                                                                                                                                                                                                                                                                                                                                                                                                                                                                                                                                                                                                                                                                                                         |
| Date Submitted by the Author:   | 16-Nov-2017                                                                                                                                                                                                                                                                                                                                                                                                                                                                                                                                                                                                                                                                                                                                                                                                                                                                                                                                                                                                                                                                                                                                                      |
| Complete List of Authors:       | Mehta, Gautam; UCL, Institute for Liver and Digestive Health<br>Macdonald, Stewart; UCL, Institute for Liver and Digestive Health<br>Cronberg, Alexandra; Camden and Islington Public Health<br>Rosselli, Matteo; UCL, Institute for Liver and Digestive Health<br>Khera-Butler, Tanya; Camden and Islington Public Health<br>Sumpter, Colin; Camden and Islington Public Health<br>Al-Khatib, Safa; UCL, Institute for Liver and Digestive Health<br>Jain, Anjly; Royal Free London NHS Foundation Trust, Department of Clinical Biochemistry<br>Maurice, James; UCL, Institute for Liver and Digestive Health<br>Charalambous, Christos; UCL, Institute for Liver and Digestive Health<br>Gander, Amir; UCL, Tissue Access for Patient Benefit<br>Ju, Cynthia; McGovern Medical School, Department of Anesthesiology<br>Hakan, Talay; Royal Free Hampstead NHS Trust<br>Sherwood, Roy; King's College Hospital NHS Foundation Trust<br>Nair, Devaki; Royal Free London NHS Foundation Trust, Department of Clinical Biochemistry<br>Jalan, Rajiv; UCL, Institute for Liver and Digestive Health<br>Moore, Kevin; UCL, Institute for Liver and Digestive Health |
| <b>Primary Subject Heading</b>: | Gastroenterology and hepatology                                                                                                                                                                                                                                                                                                                                                                                                                                                                                                                                                                                                                                                                                                                                                                                                                                                                                                                                                                                                                                                                                                                                  |
| Secondary Subject Heading:      | Gastroenterology and hepatology, Public health                                                                                                                                                                                                                                                                                                                                                                                                                                                                                                                                                                                                                                                                                                                                                                                                                                                                                                                                                                                                                                                                                                                   |
| Keywords:                       | Alcohol, Insulin resistance, Cancer, Fatty liver                                                                                                                                                                                                                                                                                                                                                                                                                                                                                                                                                                                                                                                                                                                                                                                                                                                                                                                                                                                                                                                                                                                 |
|                                 |                                                                                                                                                                                                                                                                                                                                                                                                                                                                                                                                                                                                                                                                                                                                                                                                                                                                                                                                                                                                                                                                                                                                                                  |

SCHOLARONE™  
Manuscripts

## The Effect of Alcohol Consumption on Cardiovascular Risk Factors, Liver Function Tests and Cancer-Related Growth Factors

Gautam Mehta, Stewart Macdonald, Alexandra Cronberg, Matteo Rosselli, Tanya Khera-Butler, Colin Sumpter, Safa Al-Khatib, Anjly Jain, James Maurice, Christos Charalambous, Amir Gander, Cynthia Ju, Talay Hakan, Roy Sherwood, Devaki Nair, Rajiv Jalan, Kevin Moore

1. Gautam Mehta PhD MRCP, Honorary Consultant and Senior Lecturer, UCL Institute for Liver and Digestive Health, Division of Medicine, Royal Free Campus, Rowland Hill Street, London NW3 2PF, UK. \*Corresponding author: gautam.mehta@ucl.ac.uk. Telephone: 07715232734.
2. Stewart Macdonald MRCP, Research Fellow, UCL Institute for Liver and Digestive Health, Division of Medicine, Royal Free Campus, Rowland Hill Street, London NW3 2PF, UK.
3. Alexandra Cronberg MSc, Senior Public Health Information Analyst, Camden and Islington Public Health, Islington Town Hall, 222 Upper Street, London N1 1XR, UK.
4. Matteo Rosselli MD, Senior Research Fellow, UCL Institute for Liver and Digestive Health, Division of Medicine, Royal Free Campus, Rowland Hill Street, London NW3 2PF, UK.
5. Tanya Khera-Butler MSc, Public Health Information Analyst, Camden and Islington Public Health, Islington Town Hall, 222 Upper Street, London, N1 1XR, UK.
6. Colin Sumpter MSc, Public Health Strategist, Camden and Islington Public Health, Islington Town Hall, 222 Upper Street, London, N1 1XR, UK.
7. Safa Al Khatib MSc, Postgraduate student, UCL Institute for Liver and Digestive Health, Division of Medicine, Royal Free Campus, Rowland Hill Street, London NW3 2PF, UK.
8. Anjly Jain MD, Research Fellow, Department of Clinical Biochemistry, Royal Free London NHS Foundation Trust, Pond Street, London NW3 2QG, UK.
9. James Maurice MRCP, Research Fellow, UCL Institute for Liver and Digestive Health, Division of Medicine, Royal Free Campus, Rowland Hill Street, London NW3 2PF, UK.
10. Christos Charalambous, Undergraduate student, UCL Institute for Liver and Digestive Health, Division of Medicine, Royal Free Campus, Rowland Hill Street, London NW3 2PF, UK.
11. Amir Gander PhD, Director of UCL Tissue Access for Patient Benefit, Royal Free Campus, Rowland Hill Street, London NW3 2PF, UK.
12. Cynthia Ju PhD, Professor and Vice Chair for Research, Department of Anesthesiology, McGovern Medical School, University of Texas Health Science Center at Houston, Texas 77030, USA.
13. Talay Hakan, Fibroscan Technician, Royal Free London NHS Foundation Trust, Pond Street, London NW3 2QG, UK.
14. Roy Sherwood DPhil, Professor of Clinical Biochemistry, King's College Hospital NHS Foundation Trust, Denmark Hill, London SE5 9RS, UK.
15. Devaki Nair FRCPath, Clinical Lead for Clinical Biochemistry, Department of Clinical Biochemistry, Royal Free London NHS Foundation Trust, Pond Street, London NW3 2QG, UK.
16. Rajiv Jalan FRCP, Professor of Hepatology, UCL Institute for Liver and Digestive Health, Division of Medicine, Royal Free Campus, Rowland Hill Street, London NW3 2PF, UK.
17. Kevin Moore FRCP, Professor of Hepatology, UCL Institute for Liver and Digestive Health, Division of Medicine, Royal Free Campus, Rowland Hill Street, London NW3 2PF, UK. \*Senior author.

**Keywords:** Alcohol, Insulin Resistance, Cancer, Fatty Liver.

**Word count:** 2793 (excluding title page, abstract, acknowledgements, references, tables and figures).

**Number of figures:** 3. **Number of tables:** 2.

## **Abstract**

**Objective:** To assess the effects of abstinence from alcohol on metabolic risk factors and cancer-related growth factors.

**Design:** Prospective, observational study.

**Setting:** Single tertiary centre.

**Participants:** Healthy subjects were recruited based on intention to: (i) abstain from alcohol for one month (abstinence group), or (ii) continue to drink alcohol (control group). Inclusion criteria were baseline alcohol consumption >64g/week (males) or >48g/week (females). Exclusion criteria were known liver disease or alcohol dependence.

**Primary and secondary outcome measures:** The primary outcome was change in insulin resistance (HOMA score). Secondary outcomes were changes in weight, blood pressure, VEGF, EGF, and liver function tests. Primary and secondary outcomes were adjusted for changes in diet, exercise, and cigarette smoking.

**Results:** The abstinence group comprised 94 participants (mean age 45.5 years, SD±1.2) and the control group 47 participants (mean age 48.7 years, SD±1.8). Baseline alcohol consumption in the abstinence group was 258.2g/week, SD±9.4, and in the control group 233.8g, SD±19.0. Significant reductions from baseline in the abstinence group (all  $p<0.001$ ) were found in: HOMA score (-25.9%, IQR -48.6 to +0.3%), systolic blood pressure (-6.6%, IQR -11.8% to 0.0%), diastolic blood pressure (-6.3%, IQR -14.1% to +1.3%), weight (-1.5%, IQR -2.9% to -0.4%), VEGF (-41.8%, IQR -64.9% to -17.9%) and EGF (-73.9%, IQR -86.1% to -36.4%). None of these changes were associated with changes in diet, exercise or cigarette smoking. No significant changes from baseline in primary or secondary outcomes were noted in the control group.

1  
2  
3 **Conclusion:** These findings demonstrate that abstinence from alcohol in moderate-  
4 heavy drinkers improves insulin resistance, weight, blood pressure and cancer-  
5 related growth factors. These data support an independent association of alcohol  
6 consumption with cancer risk, and suggest an increased risk of metabolic diseases  
7 such as type 2 diabetes and fatty liver disease.  
8  
9  
10  
11  
12

### 13 14 15 **Strengths and limitations of this study**

#### 16 17 **Strengths:**

- 18 - Prospective study design
- 19 - Recruitment of a control group
- 20 - Thorough characterization of the biological and lifestyle confounders

#### 21 22 **Limitations:**

- 23 - Lack of randomization to groups
- 24 - Study cohort all from university teaching hospital or science magazine.

25  
26  
27  
28  
29  
30  
31  
32  
33  
34  
35 **Funding:** This work was funded by the Royal Free Charity, Camden and Islington  
36 Public Health, and the Royal Free London NHS Foundation Trust.  
37  
38

39  
40  
41  
42 **Competing interests declaration:** None of the authors, or their spouses/children,  
43 have a financial relationship with any organization(s) that might have an interest in  
44 the submitted work in the previous three years, or any other relationship/activity that  
45 could appear to have influenced this work.  
46  
47  
48  
49

50  
51  
52 **Data sharing statement:** All raw data is available on request from the  
53 corresponding author.  
54  
55  
56  
57  
58  
59

## Introduction

Alcohol is a major cause of disability and preventable death. Globally, alcohol is the 3<sup>rd</sup> commonest cause of lost years due to ill health, accounting for a greater burden of disease than tobacco smoking, hypertension or poor sanitation.[1] European countries have amongst the highest alcohol consumption. Eastern Europe has the highest *per capita* consumption worldwide,[2] and in the UK over 25% of the adult population drink in excess of recommended guidelines.[3]

Aside from liver disease, which is the 3<sup>rd</sup> commonest cause of preventable death in the UK, there is also a significant burden from alcohol-related cancer and metabolic syndrome.[3]

It has long been recognized that there is an important interaction between alcohol misuse and fatty liver disease. One of the main factors driving the development of fatty liver disease and steatohepatitis is insulin resistance. Thus, any action that improves insulin resistance will have a major impact on the development and severity of fatty liver disease.

In this climate of increased awareness of alcohol-related morbidity, the UK Chief Medical Officers have revised downwards their weekly guidance limits.[4] Additionally, public health campaigns, where non-dependent drinkers are encouraged to commit to one month of abstinence from alcohol, are increasingly common. However, the biological effects of short-term abstinence in this group remain unknown. The aim of this study was to assess the effects of short-term

1  
2  
3 abstinence on biochemical and physiological parameters, as well as on longer term  
4 drinking behaviour.  
5  
6  
7  
8

## 9 **Methods**

10 **Study Design:** This was a single-centre, prospective, observational study conducted  
11 at the Royal Free London NHS Foundation Trust. Ethical approval was granted by  
12 the NRES Committee (14/NW/1510). Study recruitment was initiated through email  
13 advertising within University College London, Queen Mary University of London, and  
14 New Scientist Magazine. The entry criteria were baseline alcohol consumption of  
15 >64g/week (8 units) for males or >48g/week (6 units) for females. Exclusion criteria  
16 were >3 days abstinence from alcohol prior to commencement of the study, the  
17 presence of known liver disease or alcohol dependence. Participants were not  
18 randomized to group, but were allocated based on intention to maintain abstinence  
19 for one month (abstinence group) or to continue alcohol consumption (control group).  
20  
21  
22  
23  
24  
25  
26  
27  
28  
29  
30  
31  
32  
33  
34

35 Participants were assessed at baseline, and after one-month. The primary outcome  
36 was change in insulin resistance (HOMA score) at baseline and one-month.  
37 Secondary outcomes were changes in weight, blood pressure, VEGF, EGF and liver  
38 function tests. Information on diet, exercise, and smoking history were obtained by  
39 self-reporting using components of the SLIQ lifestyle questionnaire[5]. Self-reported  
40 alcohol intake was assessed at baseline using the full AUDIT questionnaire, and a  
41 direct interview by a single interviewer (KM) was also conducted to assess alcohol  
42 intake over the preceding two-months, using the timeline follow back method.[6]  
43  
44  
45  
46  
47  
48  
49  
50  
51  
52  
53  
54  
55  
56  
57  
58  
59  
60

1  
2  
3 determine drinking habits following the study period, using the full AUDIT  
4 questionnaire (modified to capture data for the preceding 6-8 months).  
5  
6  
7

8  
9 Sample size calculation based on interim analysis of data from the abstinence group  
10 indicated a control group of 47 was required to adequately detect a statistically  
11 significant change in HOMA score (80% power, alpha 5%, 2-sided test).  
12  
13  
14

15  
16  
17 Blood pressure (BP) was measured seated, following a 2-minute rest period, and the  
18 mean of three measurements was recorded. Fasting blood was taken, between 8am  
19 and midday, for measurement of glucose, insulin, liver function tests, lipids,  
20 carbohydrate deficient transferrin (abstinence group only) and VEGF (isoforms 165,  
21 145 and 121) and EGF (Randox Investigator, Randox, Belfast, UK). The HOMA  
22 score was calculated according to the methods of Matthews et al.[7] Participants with  
23 diabetes requiring treatment were excluded from HOMA measurements.  
24  
25  
26  
27  
28  
29  
30  
31  
32  
33  
34

35 **Statistical analysis:** Baseline and one-month differences were analysed by paired t-  
36 test for normally distributed differences in continuous variables, by Wilcoxon signed  
37 rank test for not normally distributed differences in continuous variables, and  
38 differences in categorical variables by Chi-square test. Differences between  
39 abstinence and control groups were analysed by unpaired t-test for normally  
40 distributed variables, and Mann-Whitney test for variables that were not normally  
41 distributed. Lifestyle factors were categorically graded (better/same/worse), and  
42 delta change in biological variables between lifestyle groups was assessed by  
43 Kruskal-Wallis test. Correlation between biological variables was assessed by  
44 Spearman's correlation. All analyses were performed using STATA version 13.1 and  
45  
46  
47  
48  
49  
50  
51  
52  
53  
54  
55  
56  
57  
58  
59  
60



1  
2  
3 SPSS Statistics version 21.0. Standard deviation (SD) is reported for means and  
4 interquartile range (IQR) for medians where applicable. All p values are 2 sided;  
5  
6  $p < 0.01$  was considered significant to account for multiple comparisons.  
7  
8  
9

## 10 11 **Results**

12  
13 Ninety-seven participants were recruited to the abstinence group, and forty-eight  
14 participants to the control group. Three subjects in the abstinence group and one  
15 subject in the control group did not attend for follow-up. Thus, the final abstinence  
16 group comprised ninety-four participants (43 male, 51 female) mean age 45.5 years,  
17 SD $\pm$ 1.2, and the control group comprised 47 participants (22 male, 25 female) mean  
18 age 48.7 years, SD $\pm$ 1.8. Mean baseline alcohol intake for the abstinence group was  
19 258.2g/week, SD $\pm$ 9.4 (men 275.9, SD $\pm$ 25.5; women 243.1, SD $\pm$ 12.8). All subjects in  
20 this group, except one individual, remained abstinent for the study period - this  
21 participant was included in all analyses. Mean weekly baseline alcohol intake for the  
22 control group was 233.8g, SD $\pm$ 19.0 (men 270.2, SD $\pm$ 26.6; women 200.2, SD $\pm$ 25.8),  
23 and was not significantly different at one-month 260.1g, SD $\pm$ 20.8 (men 286.4,  
24 SD $\pm$ 26.6; women 235.8, SD $\pm$ 31.1),  $p = 0.11$ . A flowchart of participants and  
25 observations is shown in figure 1.  
26  
27  
28  
29  
30  
31  
32  
33  
34  
35  
36  
37  
38  
39  
40  
41  
42  
43

44 Baseline and one-month variables for the abstinence and control groups are listed in  
45 table 1. There were no significant differences in baseline characteristics between  
46 abstinence and control groups, aside from baseline blood pressure which was  
47 significantly lower in the control group (systolic bp: 135.8 SD $\pm$ 1.9mmHg vs 125.7  
48 SD $\pm$ 2.0mmHg,  $p < 0.01$ ; diastolic bp: 87.7 SD $\pm$ 1.2mmHg vs 74.3.7 SD $\pm$ 1.5mmHg,  
49  $p < 0.01$ ). Anti-hypertensives were used in one participant in the abstinence group,  
50  
51  
52  
53  
54  
55  
56  
57  
58  
59  
60

1  
2  
3 and one participant in the control group. Lipid-lowering agents were used in two  
4 participants in the abstinence group, one subject in the control group. These  
5 participants were excluded from analyses for blood pressure and lipids respectively.  
6  
7 Significant reductions from baseline (pre vs post) in the abstinence group were  
8  
9 observed in: HOMA score (-25.9%, IQR -48.6 to +0.3%), systolic blood pressure (-  
10  
11 6.6%, IQR -11.8% to 0.0%), diastolic blood pressure (-6.3%, IQR -14.1% to +1.3%)  
12  
13 and weight (-1.5%, IQR -2.9% to -0.4%). HOMA score was not performed due to  
14  
15 type 1 diabetes in one participant in the abstinence group. By chance, no  
16  
17 participants had type 2 diabetes. Levels of VEGF and EGF also markedly reduced  
18  
19 in the abstinence group, at -41.8% (IQR -64.9% to -17.9%) and -73.9% (IQR -86.1%  
20  
21 to -36.4%) respectively (figure 2). Serum lipids (pre vs post) also improved in the  
22  
23 abstinence group: fasting total serum cholesterol (-13.4%, IQR -18.9% to -2.7%),  
24  
25 LDL cholesterol (-9.4%, IQR -20.1% to +4.8%), HDL cholesterol (-16.7%, IQR -  
26  
27 25.0% to 0.0%). All the above variables were significantly reduced from baseline,  
28  
29  $p < 0.001$ . By contrast, the control group did not show significant changes from  
30  
31 baseline in any of the above variables. Changes from baseline in HOMA score,  
32  
33 VEGF, EGF, weight, systolic and diastolic blood pressure are shown in figure 3.  
34  
35  
36  
37  
38  
39  
40  
41  
42  
43  
44  
45  
46  
47  
48  
49  
50  
51  
52  
53  
54  
55  
56  
57  
58  
59  
60

Table 1: Baseline and one-month variables for abstinence and control groups.

| Variable [units]                                     | Abstinence Group                     |                     |                     |                       | Control Group                        |                     |                     |                       |
|------------------------------------------------------|--------------------------------------|---------------------|---------------------|-----------------------|--------------------------------------|---------------------|---------------------|-----------------------|
|                                                      | Number of paired values <sup>a</sup> | Baseline            | One-month           | p-value (pre vs post) | Number of paired values <sup>a</sup> | Baseline            | One-month           | p-value (pre vs post) |
| HOMA score [median (IQR)]                            | 86                                   | 1.4 (1.0-2.1)       | 1.0 (0.7-1.4)       | p<0.001               | 47                                   | 1.2 (0.9-1.5)       | 1.1 (0.9-1.5)       | p=0.42                |
| Systolic blood pressure [mmHg, median (IQR)]         | 93                                   | 136.0 (121.0-147.5) | 125.0 (115.0-141.0) | p<0.001               | 47                                   | 121.0 (118.0-134.0) | 122.0 (116.0-131.0) | p=0.17                |
| Diastolic blood pressure [mmHg, mean (SD)]           | 93                                   | 89.0 (80.0-95.5)    | 82.0 (77.0-89.0)    | p<0.001               | 47                                   | 71.0 (68.0-80.0)    | 75.0 (68.0-80.0)    | p=0.77                |
| Weight [kg, median (IQR)]                            | 89                                   | 81.1 (67.0-89.7)    | 79.5 (66.7-87.2)    | p<0.001               | 47                                   | 73.8 (65.2-85.0)    | 72.6 (64.9-84.6)    | p=0.09                |
| VEGF [ng/L, median (IQR)]                            | 81                                   | 7.6 (5.5-16.0)      | 4.0 (3.1-5.8)       | p<0.001               | 41                                   | 13.4 (9.0-17.9)     | 12.9 (8.3-18.5)     | p=0.34                |
| EGF [ng/L, median (IQR)]                             | 81                                   | 7.2 (3.6-13.5)      | 1.5 (1.0-2.5)       | p<0.001               | 41                                   | 3.8 (1.0-10.3)      | 4.9 (1.0-9.5)       | p=0.55                |
| Total Cholesterol [mg/dL, median (IQR)]              | 88                                   | 228.7 (198.4-258.4) | 202.1 (176.3-227.4) | p<0.001               | 47                                   | 208.8 (177.9-232.0) | 205.0 (177.9-239.8) | p=0.25                |
| LDL [mg/dL, median (IQR)]                            | 88                                   | 131.5 (112.3-163.1) | 127.0 (97.4-153.8)  | p<0.001               | 47                                   | 112.1 (88.9-139.2)  | 112.1 (85.1-143.1)  | p=0.16                |
| HDL [mg/dL, median (IQR)]                            | 88                                   | 74.4 (±22.3)        | 60.9 (±17.8)        | p<0.001               | 47                                   | 73.5 (58.0-88.9)    | 73.5 (58.0-92.8)    | p=0.95                |
| Triglycerides [mg/dL, median (IQR)]                  | 88                                   | 79.3 (57.6-115.8)   | 76.6 (60.4-103.2)   | p=0.05                | 47                                   | 79.7 (62.0-124.0)   | 79.7 (62.0-106.3)   | p=0.70                |
| Fasting glucose [mg/dL, median (IQR)]                | 92                                   | 86.4 (79.2-93.6)    | 82.8 (77.4-90.0)    | p<0.01                | 47                                   | 91.8 (86.4-95.4)    | 90.0 (84.6-96.8)    | p=0.92                |
| Gamma GT [IU/L, median (IQR)]                        | 92                                   | 22.5 (14.0-34.8)    | 15.0 (10.3-24.0)    | p<0.001               | 46                                   | 39.8±8.3            | 44.8±11.0           | p=0.26                |
| ALT [IU/L, median (IQR)]                             | 94                                   | 25.0 (18.0-37.0)    | 20.0 (16.0-29.3)    | p<0.001               | 47                                   | 24.0 (18.0-31.0)    | 25.0 (20.0-33.0)    | p=0.06                |
| AST [IU/L, median (IQR)]                             | 94                                   | 23.0 (19.0-28.0)    | 21.0 (18.0-27.0)    | p=0.03                | 47                                   | 20.0 (17.0-24.0)    | 22.0 (19.0-27.0)    | p<0.01                |
| Carbohydrate deficient transferrin [%, median (IQR)] | 81                                   | 0.7 (0.5-1.1)       | 0.6 (0.4-0.8)       | p<0.001               | n/a                                  | n/a                 | n/a                 | n/a                   |

Abbreviations: HOMA, homeostatic model assessment; VEGF, vascular endothelial growth factor; EGF, epidermal growth factor; LDL, low density lipoprotein; HDL, high density lipoprotein; ALT, alanine aminotransferase; AST aspartate aminotransferase.

<sup>a</sup>Where the number of paired observations is less than 94 (abstinence group) or 47 (control group), this is due to missing data points.

1  
2  
3 Liver function tests also improved in the abstinence group, thus, there was a  
4 significant reduction in serum ALT (-14.5%, IQR -28.9 to +6.7%,  $p < 0.001$ ) and  
5 gamma GT (-28.6%, IQR -43.5 to -14.4%,  $p < 0.001$ ), and a trend towards reduction  
6 in serum AST (-5.4%, IQR -16.2 to +9.5%,  $p = 0.03$ ). No significant change in these  
7 variables was seen in the control group, aside from a small rise in AST (+4.5%, IQR  
8 -5.6 to +23.1%,  $p < 0.01$ ).  
9  
10  
11  
12  
13  
14  
15

16  
17  
18 Lifestyle factors did not account for changes in the abstinence group. No changes  
19 were seen in exercise score (10.9 SD $\pm$ 4.7 vs 10.7 SD $\pm$ 4.6,  $p = 0.82$ ) or cigarette  
20 smoking (1.3 SD $\pm$ 0.7 vs 1.4 SD $\pm$ 0.7,  $p = 0.17$ ). A small change in diet score was  
21 noted (from 8.2 SD $\pm$ 3.3 to 8.8 SD $\pm$ 3.0,  $p = 0.03$ ). The pre/post differences in HOMA  
22 score, weight, VEGF, EGF, triglycerides and HDL were distributed with a left  
23 (negative) skew, and could not be transformed for regression analysis. Therefore,  
24 non-parametric approaches were adopted to account for lifestyle variables. Changes  
25 in HOMA score, BP, and weight in the abstinence group were not associated with  
26 changes in any lifestyle score (supplemental table 1). There was also no association  
27 between changes in HOMA score and weight ( $r = 0.04$ ,  $p = 0.73$ ). However, changes in  
28 total cholesterol and LDL cholesterol attained borderline significance between  
29 groups when compared by change in diet in the abstinence group (supplemental  
30 table 1;  $p = 0.01$  and  $p = 0.02$  respectively).  
31  
32  
33  
34  
35  
36  
37  
38  
39  
40  
41  
42  
43  
44  
45  
46  
47

48 A further important result relates to follow-up questionnaire data, obtained in 77  
49 individuals (81.9%) in the abstinence group and 40 (83.3%) in the control group, at  
50 6-8 months following the study period. In the abstinence group, a significant  
51 reduction in alcohol consumption was maintained from their pre-study assessment.  
52  
53  
54  
55  
56  
57  
58  
59  
60

1  
2  
3 Thus, there was a significant reduction in overall AUDIT score from 10·0 (IQR 7·0 to  
4 15·0) to 7·0 (IQR 5·0 to 9·0),  $p<0\cdot001$ , and in the proportion of individuals with  
5 harmful use of alcohol (AUDIT score $>8$ ) (61·0% vs 28·5%,  $p<0\cdot001$ ) at 6-8 months  
6 compared with baseline. By contrast, in the control group there was a non-significant  
7 trend to reduction in overall AUDIT score from 8·5 (IQR 6·3 to 12·0) to 8·0 (IQR 6·0  
8 to 10·8),  $p=0\cdot06$ , and no significant change in the proportion with harmful use (50%  
9 vs 40%,  $p=0\cdot37$ ).  
10  
11  
12  
13  
14  
15  
16  
17  
18  
19

## 20 **Discussion**

21  
22 This study is the first to comprehensively assess the effects of short-term abstinence  
23 from alcohol in a population of 'healthy' individuals, who are representative of the  
24 25% of the wider population who drink alcohol above national guidelines. The key  
25 findings of this study are improvements in insulin resistance, blood pressure, body  
26 weight, and a decrease in circulating concentrations of cancer-related growth factors  
27 following a month of abstinence from alcohol.  
28  
29  
30  
31  
32  
33  
34  
35  
36  
37

38 The strengths of this study are the prospective study design, the recruitment of a  
39 control group, and the thorough characterization of the participant's biological and  
40 lifestyle data. A weakness is the lack of randomization of groups, although for ethical  
41 reasons the allocation of individuals to a pre-defined alcohol consumption regimen  
42 was inappropriate. A further weakness relates to the study cohort, who were  
43 recruited through staff at university teaching hospitals and a science magazine, and  
44 thus probably had higher educational attainment and health-related motivation than  
45 the average population. A further confounder is the possibility of lifestyle change in  
46 the abstinence group, alongside abstinence from alcohol. We have tried to minimize  
47  
48  
49  
50  
51  
52  
53  
54  
55  
56  
57  
58  
59  
60

1  
2  
3 the impact of these using the SLIQ questionnaire, a self-reported measure of lifestyle  
4 factors contributing to metabolic risk with good re-test reliability.[5] As such, changes  
5 in HOMA score, weight and blood pressure were independent of changes in lifestyle  
6 as measured by the SLIQ score. Nevertheless, it remains possible that the  
7 questionnaire scoring for diet, exercise and cigarette smoking has inadequate  
8 sensitivity for all lifestyle changes within this cohort.  
9  
10  
11  
12  
13  
14  
15  
16  
17

18 The primary endpoint of insulin resistance, measured by HOMA score, showed a  
19 marked decrease (~25%) following the cessation of alcohol consumption. Previous  
20 epidemiological data has supported a protective effect of low-dose alcohol use on  
21 the risk of type 2 diabetes,[8] although prospective alcohol intervention studies have  
22 provided mixed results.[9,10] Our data suggest that alcohol use above  
23 recommended guidance markedly increases the risk of type 2 diabetes. Moreover,  
24 the observed effects of abstinence on HOMA score noted in this study are too  
25 dramatic to be accounted for by weight loss alone, and no specific association was  
26 found between change in HOMA score and weight. To our knowledge, this is the first  
27 paper to prospectively demonstrate a link between excess alcohol consumption and  
28 insulin resistance.  
29  
30  
31  
32  
33  
34  
35  
36  
37  
38  
39  
40  
41  
42  
43

44 A major novel finding of this study is the rapid decrease in serum VEGF and EGF  
45 with short-term abstinence from alcohol, which was seen in 90% of subjects in the  
46 abstinence group. Importantly, these changes were not seen in the control group  
47 with continued alcohol consumption. Alcohol is thought to be causally related to the  
48 development of several cancers, including the digestive tract, nasopharynx, liver and  
49 breast.[11] The increased risk caused by alcohol persists even at low-levels of  
50  
51  
52  
53  
54  
55  
56  
57  
58  
59  
60

1  
2  
3 consumption. The mechanism remains unknown. We chose to study VEGF and  
4 EGF, since they are the both highly expressed in the solid tumours listed above, and  
5 are common therapeutic targets for these tumours.[12] VEGF plays a key role in  
6 tumour progression through angiogenic pathways, and VEGF expression is driven by  
7 oncogene expression (eg. Ras, src, HER2, EGFR).[13] EGF signalling contributes to  
8 oncogenesis by directly promoting cell proliferation,[14] and expression levels are  
9 correlated with progressive tumour growth and metastasis.[15-17]  
10  
11  
12  
13  
14  
15  
16  
17  
18  
19

20 Mechanistically, rodent models have demonstrated that alcohol exposure directly  
21 promotes the progression of several cancers, including breast cancer. Lu et al have  
22 shown, in a mouse model of breast cancer, that alcohol directly induces tumor  
23 angiogenesis and accelerated tumor growth through a VEGF-dependent  
24 mechanism.[18] Similar evidence for an alcohol-VEGF pathway exists in mouse  
25 models of colon cancer and melanoma.[19,20] The EGF pathway has also been  
26 implicated in alcohol-related breast cancer.[21-23] The baseline levels of VEGF and  
27 EGF reported in this study are lower than reported in other studies exploring  
28 associations of circulating VEGF/EGF levels with the occurrence of solid  
29 tumours.[24-26] These differences are explained by the method of sample collection.  
30 The collection of blood into EDTA tubes, as in this study, leads to reduced  
31 contribution of platelet-derived VEGF and EGF, and thus lower plasma  
32 concentrations.[27.28]  
33  
34  
35  
36  
37  
38  
39  
40  
41  
42  
43  
44  
45  
46  
47  
48  
49

50 Here, we demonstrate for the first time in humans a marked effect of abstinence on  
51 circulating concentrations of VEGF and EGF, which suggests that alcohol  
52 consumption *per se* increases the concentrations of these growth factors. There is  
53  
54  
55  
56  
57  
58  
59  
60

1  
2  
3 strong evidence that these growth factors play an important role in oncogenesis.  
4  
5 However, it would be wrong to speculate further on this observation without  
6  
7 longitudinal study in subjects who continue moderate alcohol consumption.  
8  
9

10  
11 These data also show the dynamic effect of regular alcohol consumption on blood  
12  
13 pressure, an effect that is maintained in healthy individuals with no history of  
14  
15 hypertension requiring medication. An effect of alcohol on blood pressure has long  
16  
17 been recognized, with consumption greater than two daily doses considered to be  
18  
19 one of the most common reversible causes of hypertension.[29]  
20  
21  
22  
23

24 Collectively, the above findings have implications for the risk of synergistic liver injury  
25  
26 amongst individuals with risk factors for alcohol-related liver disease (ALD) and fatty  
27  
28 liver disease. Previous studies have emphasized an association between these  
29  
30 pathways of liver injury, since serum ALT amongst moderate drinkers is elevated to  
31  
32 a greater extent in those with higher BMI, and ALD and fatty liver are pathologically  
33  
34 similar. Two prospective cohort studies from Scotland have demonstrated an  
35  
36 increased risk of liver disease with alcohol use and elevated BMI.[30] More recently,  
37  
38 a large prospective study of over 100,000 women in the UK confirmed a synergistic  
39  
40 association between alcohol and high BMI and risk of chronic liver disease.[31]  
41  
42 Since alcohol use and insulin resistance are both directly implicated in the  
43  
44 development of steatohepatitis, the results of this study provide further support for  
45  
46 this common causal pathway. Further, changes in the gut microbiome have also  
47  
48 been implicated in the pathogenesis of steatohepatitis and obesity,[32] and therefore  
49  
50 changes in gut microbe populations following abstinence from alcohol are a further  
51  
52  
53  
54  
55  
56  
57  
58  
59  
60



1  
2  
3 possible explanation for the biological changes observed in this study. These  
4  
5 hypotheses merit further attention in subsequent mechanistic studies.  
6  
7

8  
9 A frequent criticism of public health strategies of short-term abstinence (eg. Dry  
10  
11 January) has been the lack of evidence of health benefits, or even negative effects  
12  
13 on longer-term alcohol consumption. This study demonstrates a durable effect on  
14  
15 drinking behaviour following a short-term period of abstinence, albeit we cannot  
16  
17 exclude the behavioural effect of participation in the study.  
18  
19

20  
21  
22 Although this study has demonstrated health benefits from short-term abstinence, a  
23  
24 possible misrepresentation of these results is the concept that a 'detox' period is all  
25  
26 that is required to 'refresh' the liver or achieve other health gains. This is clearly  
27  
28 untrue, since the durability of the observed biological effects remains to be  
29  
30 established. The data presented here represent an important public health message,  
31  
32 providing supportive mechanistic evidence for the recent changes in alcohol  
33  
34 guidance due to cancer risk, and the synergistic relationship between alcohol and  
35  
36 metabolic syndrome. Further attention should be directed to determining the  
37  
38 durability of these biological effects of abstinence, and conveying these complex  
39  
40 public health messages to the public.  
41  
42  
43  
44  
45  
46  
47  
48  
49  
50  
51  
52  
53  
54  
55  
56  
57  
58  
59  
60

**Acknowledgements / Contributors:**

GM contributed to study design, participated in data collection, wrote the analytical plan, and drafted and revised the paper. He is guarantor. SM participated in study design, participated in data collection, and drafted and revised the paper. AC and TKB analysed the data, and drafted and revised the paper. CS participated in study design, and revision of the paper. MR, SAK, AJ, CC, JM, AG and TH participated in data collection and revision of the paper. CJ, RS, DN and RJ contributed to study design, and revision of the paper. KM supervised the study, contributed to study design, participated in data collection and drafted and revised the paper. Administrative support for the study was provided by Ms Patricia Langley.

## References

1. World Health Organization. Global health risks. Mortality and burden of disease attributable to selected major risks. World Health Organization, Geneva, Switzerland; 2009.
2. Rehm J, Samokhvalov AV, Shield KD. Global burden of alcoholic liver diseases. *J Hepatol* 2013; 59(1): 160-8.
3. Williams R, Aspinall R, Bellis M, et al. Addressing liver disease in the UK: a blueprint for attaining excellence in health care and reducing premature mortality from lifestyle issues of excess consumption of alcohol, obesity, and viral hepatitis. *Lancet* 2014; 384(9958): 1953-97.
4. Department of Health. UK Chief Medical Officers' Alcohol Guidelines Review: Summary of the proposed new guidelines. [https://www.gov.uk/government/uploads/system/uploads/attachment\\_data/file/489795/summary](https://www.gov.uk/government/uploads/system/uploads/attachment_data/file/489795/summary)
5. Godwin M, Streight S, Dyachuk E, et al. Testing the Simple Lifestyle Indicator Questionnaire: Initial psychometric study. *Can Fam Physician* 2008; 54(1): 76-7.
6. Sobell LCS, M.B. Timeline follow-back: a technique for assessing self-reported ethanol consumption. *Measuring Alcohol Consumption: Psychosocial and Biological Methods*; 1992.
7. Matthews DR, Hosker JP, Rudenski AS, Naylor BA, Treacher DF, Turner RC. Homeostasis model assessment: insulin resistance and beta-cell function from fasting plasma glucose and insulin concentrations in man. *Diabetologia* 1985; 28(7): 412-9.
8. Knott C, Bell S, Britton A. Alcohol Consumption and the Risk of Type 2 Diabetes: A Systematic Review and Dose-Response Meta-analysis of More Than 1.9 Million Individuals From 38 Observational Studies. *Diabetes Care* 2015; 38(9): 1804-12
9. Schrieks IC, Heil AL, Hendriks HF, Mukamal KJ, Beulens JW. The effect of alcohol consumption on insulin sensitivity and glycemic status: a systematic review and meta-analysis of intervention studies. *Diabetes Care* 2015; 38(4): 723-32.
10. Gepner Y, Golan R, Harman-Boehm I, et al. Effects of Initiating Moderate Alcohol Intake on Cardiometabolic Risk in Adults With Type 2 Diabetes: A 2-Year Randomized, Controlled Trial. *Annals of Internal Medicine* 2015; 163(8):569-79.
11. Committee on Carcinogenicity of Chemicals in Food. Statement on consumption of alcoholic beverages and risk of cancer. <https://www.govuk/government/groups/committee-on-carcinogenicity-of-chemicals-in-food-consumer-products-and-the-environment-coc> 2015.
12. Taberero J. The role of VEGF and EGFR inhibition: implications for combining anti-VEGF and anti-EGFR agents. *Molecular Cancer Res* 2007; 5(3): 203-20.
13. Ferrara N, Gerber HP, LeCouter J. The biology of VEGF and its receptors. *Nat Med* 2003; 9(6): 669-76.
14. Arteaga CL. The epidermal growth factor receptor: from mutant oncogene in nonhuman cancers to therapeutic target in human neoplasia. *J Clin Oncol* 2001; 19(18 Suppl): 32S-40S.
15. De Jong KP, Stellema R, Karrenbeld A, et al. Clinical relevance of transforming growth factor alpha, epidermal growth factor receptor, p53, and Ki67 in colorectal liver metastases and corresponding primary tumors. *Hepatology* 1998; 28(4): 971-9.
16. Lo HW, Hung MC. Nuclear EGFR signalling network in cancers: linking EGFR pathway to cell cycle progression, nitric oxide pathway and patient survival. *Brit J Cancer* 2006; 94(2): 184-8.
17. Bracher A, Cardona AS, Tauber S, et al. Epidermal growth factor facilitates melanoma lymph node metastasis by influencing tumor lymphangiogenesis. *J Invest Dermatol* 2013; 133(1): 230-8.
18. Lu Y, Ni F, Xu M, et al. Alcohol promotes mammary tumor growth through activation of VEGF-dependent tumor angiogenesis. *Oncology Letters* 2014; 8(2): 673-8.
19. Tan W, Bailey AP, Shparago M, et al. Chronic alcohol consumption stimulates VEGF expression, tumor angiogenesis and progression of melanoma in mice. *Cancer Biol Ther* 2007; 6(8): 1211-7.
20. Gu JW, Bailey AP, Sartin A, Makey I, Brady AL. Ethanol stimulates tumor progression and expression of vascular endothelial growth factor in chick embryos. *Cancer* 2005; 103(2): 422-31.
21. Ciaroni L, Mallepell S, Brisken C. Amphiregulin is an essential mediator of estrogen receptor alpha function in mammary gland development. *P Natl Acad Sci USA* 2007; 104(13): 5455-60.
22. Willmarth NE, Baillo A, Dziubinski ML, Wilson K, Riese DJ, 2nd, Ethier SP. Altered EGFR localization and degradation in human breast cancer cells with an amphiregulin/EGFR autocrine loop. *Cell Signal* 2009; 21(2): 212-9.
23. Meng Q, Gao B, Goldberg ID, Rosen EM, Fan S. Stimulation of cell invasion and migration by alcohol in breast cancer cells. *Biochem Bioph Res Co* 2000; 273(2): 448-53.

- 1
  - 2
  - 3
  - 4
  - 5
  - 6
  - 7
  - 8
  - 9
  - 10
  - 11
  - 12
  - 13
  - 14
  - 15
  - 16
  - 17
  - 18
  - 19
  - 20
  - 21
  - 22
  - 23
  - 24
  - 25
  - 26
  - 27
  - 28
  - 29
  - 30
  - 31
  - 32
  - 33
  - 34
  - 35
  - 36
  - 37
  - 38
  - 39
  - 40
  - 41
  - 42
  - 43
  - 44
  - 45
  - 46
  - 47
  - 48
  - 49
  - 50
  - 51
  - 52
  - 53
  - 54
  - 55
  - 56
  - 57
  - 58
  - 59
  - 60
24. Burstein HJ, Chen YH, Parker LM, et al. VEGF as a marker for outcome among advanced breast cancer patients receiving anti-VEGF therapy with bevacizumab and vinorelbine chemotherapy. *Clin Cancer Res* 2008; 14(23): 7871-7.
25. Meggiato T, Plebani M, Basso D, Panozzo MP, Del Favero G. Serum growth factors in patients with pancreatic cancer. *Tumour Biol* 1999; 20(2): 65-71.
26. Yoon SS, Kim SH, Gonen M, et al. Profile of plasma angiogenic factors before and after hepatectomy for colorectal cancer liver metastases. *Ann Surg Oncol* 2006; 13(3): 353-62.
27. Webb NJ, Bottomley MJ, Watson CJ, Brenchley PE. Vascular endothelial growth factor (VEGF) is released from platelets during blood clotting: implications for measurement of circulating VEGF levels in clinical disease. *Clin Sci* 1998; 94(4): 395-404.
28. Yucel A, Karakus R, Cemalettin A. Effect of blood collection tube types on the measurement of human epidermal growth factor. *J Immunoassay Immunoch* 2007; 28(1): 47-60.
29. Beilin LJ, Puddey IB. Alcohol and hypertension: an update. *Hypertension* 2006; 47(6): 1035-8.
32. Trabut JB, Thepot V, Nalpas B, et al. Rapid decline of liver stiffness following alcohol withdrawal in heavy drinkers. *Alcohol Clin Exp Res* 2012; 36(8): 1407-11.
30. Hart CL, Morrison DS, Batty GD, Mitchell RJ, Davey Smith G. Effect of body mass index and alcohol consumption on liver disease: analysis of data from two prospective cohort studies. *BMJ* 2010; 340: c1240.
31. Trembling PM, Apostolidou S, Gentry-Maharaj A, et al. Risk of chronic liver disease in post-menopausal women due to body mass index, alcohol and their interaction: a prospective nested cohort study within the United Kingdom Collaborative Trial of Ovarian Cancer Screening (UKCTOCS). *BMC Public Health* 2017; 17(1):603.
32. Henao-Mejia J, Elinav E, Jin C, et al. Inflammasome-mediated dysbiosis regulates progression of NAFLD and obesity. *Nature* 2012; 482(7384): 179-85.

Supplemental Table 1a: Change from baseline in biological variables between categories of change in SLIQ DIET score (better / same / worse) in the abstinence group.

|                                                                |                          | Categorical change from baseline in DIET score in Abstinence Group |                          |                           | p-value <sup>a</sup> |
|----------------------------------------------------------------|--------------------------|--------------------------------------------------------------------|--------------------------|---------------------------|----------------------|
|                                                                |                          | Better (n=42) <sup>b</sup>                                         | Same (n=16) <sup>b</sup> | Worse (n=32) <sup>b</sup> |                      |
| Change from baseline in biological variable [% , median (IQR)] | HOMA                     | -14.1 (-42.6 to -0.6)                                              | -33.7 (-48.9 to +1.7)    | -34.9 (-53.1 to -1.7)     | p=0.45               |
|                                                                | Systolic blood pressure  | -6.6 (-13.3 to -1.4)                                               | -6.9 (-11.8 to +3.5)     | -6.8 (13.8 to +2.5)       | p=0.83               |
|                                                                | Diastolic blood pressure | -7.3 (-15.1 to +1.3)                                               | -5.6 (-16.1 to +5.5)     | -5.9 (-12.5 to +1.2)      | p=0.71               |
|                                                                | Weight                   | -1.5 (-2.8 to 0.0)                                                 | -1.1 (-2.8 to +0.4)      | -1.4 (-3.0 to -0.3)       | p=0.95               |
|                                                                | VEGF                     | -36.2 (-63.6 to -10.1)                                             | -57.5 (-73.9 to -30.1)   | -50.0 (-75.5 to -23.7)    | p=0.15               |
|                                                                | EGF                      | -73.0 (-85.9 to -31.8)                                             | -75.8 (-91.2 to -54.3)   | -76.7 (-88.5 to -37.5)    | p=0.54               |
|                                                                | Cholesterol              | -9.2 (-16.7 to +3.5)                                               | -17.3 (-25.0 to -13.6)   | -14.0 (-17.1 to -7.6)     | p=0.01               |
|                                                                | LDL                      | -5.1 (-19.2 to +16.8)                                              | -18.4 (-25.8 to -8.8)    | -12.2 (-18.4 to -3.8)     | p=0.02               |
|                                                                | HDL                      | -15.4 (-23.0 to -5.8)                                              | -18.9 (25.5 to -7.8)     | -21.0 (-29.7 to -10.9)    | p=0.26               |
|                                                                | Triglycerides            | -5.1 (-27.2 to +23.0)                                              | -19.9 (-33.4 to -2.1)    | +1.2 (-13.6 to +24.8)     | p=0.03               |

**Supplemental Table 1b: Change from baseline in biological variables between categories of change in SLIQ EXERCISE score (better / same / worse) in the abstinence group.**

|                                                                |                          | Categorical change from baseline in EXERCISE score in Abstinence Group |                          |                           | p-value <sup>a</sup> |
|----------------------------------------------------------------|--------------------------|------------------------------------------------------------------------|--------------------------|---------------------------|----------------------|
|                                                                |                          | Better (n=42) <sup>b</sup>                                             | Same (n=16) <sup>b</sup> | Worse (n=32) <sup>b</sup> |                      |
| Change from baseline in biological variable [% , median (IQR)] | HOMA                     | -12.2 (-45.1 to +1.8)                                                  | -26.5 (-46.3 to -1.1)    | -38.9 (-56.2 to -8.7)     | p=0.21               |
|                                                                | Systolic blood pressure  | -6.0 (-11.1 to 0.0)                                                    | -2.7 (-12.9 to +4.6)     | -8.0 (15.0 to -3.7)       | p=0.36               |
|                                                                | Diastolic blood pressure | -4.2 (-13.9 to +1.3)                                                   | -3.9 (-13.6 to +7.9)     | -8.5 (-14.9 to +0.3)      | p=0.31               |
|                                                                | Weight                   | -1.7 (-3.1 to -0.4)                                                    | -1.4 (-2.9 to +0.1)      | -1.1 (-2.5 to -0.1)       | p=0.51               |
|                                                                | VEGF                     | -28.5 (-53.2 to -10.7)                                                 | -57.4 (-75.4 to -34.4)   | -55.5 (-68.6 to -20.2)    | p=0.11               |
|                                                                | EGF                      | -74.9 (-88.5 to -32.7)                                                 | -75.0 (-91.2 to -38.2)   | -71.4 (-82.4 to -41.4)    | p=0.67               |
|                                                                | Cholesterol              | -13.7 (-18.5 to -3.2)                                                  | -12.6 (-20.1 to -4.5)    | -14.1 (-17.7 to -2.7)     | p=0.93               |
|                                                                | LDL                      | -10.8 (-18.9 to +1.9)                                                  | -10.2 (-21.0 to +5.4)    | -8.7 (-22.3 to +8.6)      | p=0.99               |
|                                                                | HDL                      | -16.7 (-25.3 to -7.6)                                                  | -16.2 (26.6 to -8.3)     | -18.3 (-25.7 to -6.9)     | p=0.97               |
|                                                                | Triglycerides            | -14.6 (-31.1 to +15.3)                                                 | -4.4 (-15.9 to +49.2)    | +4.7 (-16.7 to +14.4)     | p=0.43               |

Abbreviations: SLIQ, simple lifestyle indicator questionnaire; HOMA, homeostatic model assessment; VEGF, vascular endothelial growth factor; EGF, epidermal growth factor; LDL, low density lipoprotein; HDL, high density lipoprotein; bp, blood pressure.

- a. Participants were graded as better, same or worse based on changes in SLIQ diet score (supplemental table 1a) and exercise score (supplemental table 1b). Data for changes in cigarette smoking is not shown – only 5 individuals had a change from baseline score in the abstinence cohort. Changes from baseline in the abstinence cohort in biological variables were compared between the better / same / worse groups using the Kruskal-Wallis test.  $P < 0.01$  was considered significant to account for multiple comparisons.

Complete baseline and one-month lifestyle questionnaire data was available on 90 participants in the abstinence cohort. The number of paired values analysed for each variable are: HOMA n=82; systolic bp n=89; diastolic bp n=89; weight n=85; VEGF n=78; EGF n=78; cholesterol n=84; LDL n=84; HDL n=84; triglycerides n=84.

1  
2  
3 **Figure 1: Flow chart of study participants.**  
4  
5

6  
7 **Figure 2: Baseline and one-month data for the abstinence group presented as**  
8 **pre/post scatterplot (left) and bar chart chart (right).**  
9

10 *Bar chart data are presented as median (IQR). Panels (clockwise from top right): HOMA score,*  
11 *weight, diastolic bp, EGF, VEGF, systolic bp. Baseline and one-month values were compared with*  
12 *Wilcoxon signed rank test,  $p < 0.01$  taken as level of significance. Abbreviations: HOMA, homeostatic*  
13 *model assessment; VEGF, vascular endothelial growth factor; EGF, epidermal growth factor; bp,*  
14 *blood pressure.*  
15

16  
17 **Figure 3: Percentage change from baseline in HOMA score, VEGF, EGF, systolic bp,**  
18 **diastolic bp and weight in abstinence (dark bar) and control (light bar) groups.**  
19

20 *Data are presented as median (IQR). Changes from baseline in abstinence and control groups were*  
21 *compared with Mann Whitney test,  $p < 0.01$  taken as level of significance. Abbreviations: HOMA,*  
22 *homeostatic model assessment; VEGF, vascular endothelial growth factor; EGF, epidermal growth*  
23 *factor; bp, blood pressure.*  
24  
25  
26  
27  
28  
29  
30  
31  
32  
33  
34  
35  
36  
37  
38  
39  
40  
41  
42  
43  
44  
45  
46  
47  
48  
49  
50  
51  
52  
53  
54  
55  
56  
57  
58  
59  
60

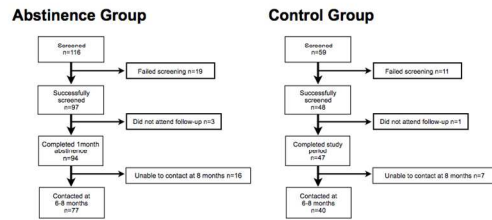

Figure 1: Flow chart of study participants

Figure 1: Flow chart of study participants.

592x370mm (72 x 72 DPI)

Review only



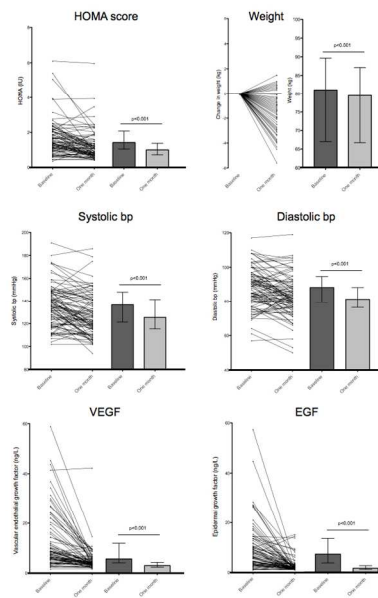

**Figure 2: Baseline and one-month data for the abstinence group presented as pre/post scatterplot (left) and bar chart (right).**

Bar chart data are presented as median (IQR). Panels (clockwise from top right): HOMA score, weight, diastolic bp, EGF, VEGF, systolic bp. Baseline and one-month values were compared with Wilcoxon signed rank test,  $p < 0.01$  taken as level of significance. *Abbreviations: HOMA, homeostatic model assessment; VEGF, vascular endothelial growth factor; EGF, epidermal growth factor; bp, blood pressure.*

592x370mm (72 x 72 DPI)

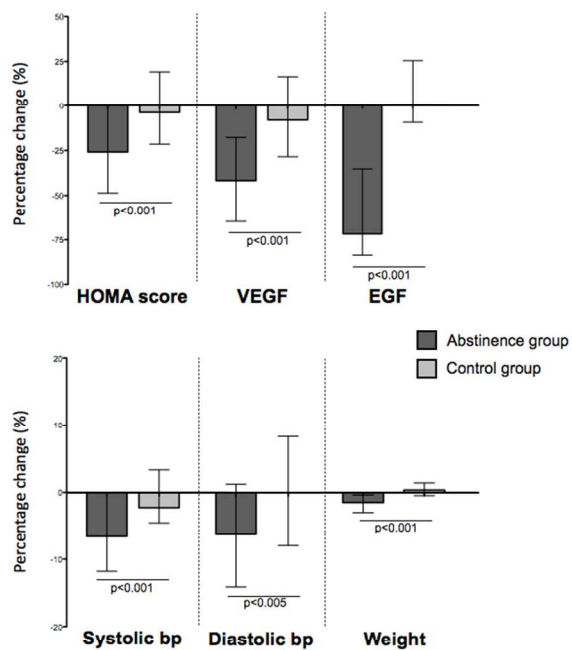

**Figure 3: Percentage change from baseline in HOMA score, VEGF, EGF, systolic bp, diastolic bp and weight in abstinence (dark bar) and control (light bar) groups.**

Data are presented as median (IQR). Changes from baseline in abstinence and control groups were compared with Mann Whitney test,  $p < 0.01$  taken as level of significance. *Abbreviations: HOMA, homeostatic model assessment; VEGF, vascular endothelial growth factor; EGF, epidermal growth factor; bp, blood pressure.*

361x270mm (72 x 72 DPI)

## STROBE Statement—checklist of items that should be included in reports of observational studies

|                          | Item No | Recommendation                                                                                                                                                                                                                                                                                                                                                                                                                                                         | Completed (page no.) |
|--------------------------|---------|------------------------------------------------------------------------------------------------------------------------------------------------------------------------------------------------------------------------------------------------------------------------------------------------------------------------------------------------------------------------------------------------------------------------------------------------------------------------|----------------------|
| Title and abstract       | 1       | (a) Indicate the study's design with a commonly used term in the title or the abstract                                                                                                                                                                                                                                                                                                                                                                                 | Yes (2)              |
|                          |         | (b) Provide in the abstract an informative and balanced summary of what was done and what was found                                                                                                                                                                                                                                                                                                                                                                    | Yes (2)              |
| Background/rationale     | 2       | Explain the scientific background and rationale for the investigation being reported                                                                                                                                                                                                                                                                                                                                                                                   | Yes (4)              |
| Objectives               | 3       | State specific objectives, including any prespecified hypotheses                                                                                                                                                                                                                                                                                                                                                                                                       | Yes (4,5)            |
| Study design             | 4       | Present key elements of study design early in the paper                                                                                                                                                                                                                                                                                                                                                                                                                | Yes (5)              |
| Setting                  | 5       | Describe the setting, locations, and relevant dates, including periods of recruitment, exposure, follow-up, and data collection                                                                                                                                                                                                                                                                                                                                        | Yes (5,6)            |
| Participants             | 6       | (a) <i>Cohort study</i> —Give the eligibility criteria, and the sources and methods of selection of participants. Describe methods of follow-up<br><i>Case-control study</i> —Give the eligibility criteria, and the sources and methods of case ascertainment and control selection. Give the rationale for the choice of cases and controls<br><i>Cross-sectional study</i> —Give the eligibility criteria, and the sources and methods of selection of participants | Yes (5,6)            |
|                          |         | (b) <i>Cohort study</i> —For matched studies, give matching criteria and number of exposed and unexposed<br><i>Case-control study</i> —For matched studies, give matching criteria and the number of controls per case                                                                                                                                                                                                                                                 | n/a                  |
| Variables                | 7       | Clearly define all outcomes, exposures, predictors, potential confounders, and effect modifiers. Give diagnostic criteria, if applicable                                                                                                                                                                                                                                                                                                                               | Yes (5,6)            |
| Data sources/measurement | 8*      | For each variable of interest, give sources of data and details of methods of assessment (measurement). Describe comparability of assessment methods if there is more than one group                                                                                                                                                                                                                                                                                   | Yes (5,6)            |
| Bias                     | 9       | Describe any efforts to address potential sources of bias                                                                                                                                                                                                                                                                                                                                                                                                              | Yes (5,6)            |
| Study size               | 10      | Explain how the study size was arrived at                                                                                                                                                                                                                                                                                                                                                                                                                              | Yes (6)              |
| Quantitative variables   | 11      | Explain how quantitative variables were handled in the analyses. If applicable, describe which groupings were chosen and why                                                                                                                                                                                                                                                                                                                                           | Yes (6)              |
| Statistical methods      | 12      | (a) Describe all statistical methods, including those used to control for confounding                                                                                                                                                                                                                                                                                                                                                                                  | Yes (6)              |
|                          |         | (b) Describe any methods used to examine subgroups and interactions                                                                                                                                                                                                                                                                                                                                                                                                    | Yes (6)              |
|                          |         | (c) Explain how missing data were addressed                                                                                                                                                                                                                                                                                                                                                                                                                            | Yes (6)              |
|                          |         | (d) <i>Cohort study</i> —If applicable, explain how loss to follow-up was addressed<br><i>Case-control study</i> —If applicable, explain how matching of cases and controls was addressed                                                                                                                                                                                                                                                                              | Yes (6)              |

|                  |     |                                                                                                                                                                                                              |                                       |
|------------------|-----|--------------------------------------------------------------------------------------------------------------------------------------------------------------------------------------------------------------|---------------------------------------|
|                  |     | <i>Cross-sectional study</i> —If applicable, describe analytical methods taking account of sampling strategy                                                                                                 |                                       |
|                  |     | (e) Describe any sensitivity analyses                                                                                                                                                                        | n/a                                   |
| Participants     | 13* | (a) Report numbers of individuals at each stage of study—eg numbers potentially eligible, examined for eligibility, confirmed eligible, included in the study, completing follow-up, and analysed            | Yes (7)                               |
|                  |     | (b) Give reasons for non-participation at each stage                                                                                                                                                         | Yes (7)                               |
|                  |     | (c) Consider use of a flow diagram                                                                                                                                                                           | Yes (figure 1)                        |
| Descriptive data | 14* | (a) Give characteristics of study participants (eg demographic, clinical, social) and information on exposures and potential confounders                                                                     | Yes (7, table 1, supplemental tables) |
|                  |     | (b) Indicate number of participants with missing data for each variable of interest                                                                                                                          | Yes (table 1)                         |
|                  |     | (c) <i>Cohort study</i> —Summarise follow-up time (eg, average and total amount)                                                                                                                             | Yes (7-10)                            |
| Outcome data     | 15* | <i>Cohort study</i> —Report numbers of outcome events or summary measures over time                                                                                                                          | Yes (7-10)                            |
|                  |     | <i>Case-control study</i> —Report numbers in each exposure category, or summary measures of exposure                                                                                                         | n/a                                   |
|                  |     | <i>Cross-sectional study</i> —Report numbers of outcome events or summary measures                                                                                                                           | n/a                                   |
| Main results     | 16  | (a) Give unadjusted estimates and, if applicable, confounder-adjusted estimates and their precision (eg, 95% confidence interval). Make clear which confounders were adjusted for and why they were included | Yes (7-10)                            |
|                  |     | (b) Report category boundaries when continuous variables were categorized                                                                                                                                    | Yes (7-10)                            |
|                  |     | (c) If relevant, consider translating estimates of relative risk into absolute risk for a meaningful time period                                                                                             | n/a                                   |
| Other analyses   | 17  | Report other analyses done—eg analyses of subgroups and interactions, and sensitivity analyses                                                                                                               | Yes (7-10)                            |
| Key results      | 18  | Summarise key results with reference to study objectives                                                                                                                                                     | Yes (7,8)                             |
| Limitations      | 19  | Discuss limitations of the study, taking into account sources of potential bias or imprecision. Discuss both direction and magnitude of any potential bias                                                   | Yes (11)                              |
| Interpretation   | 20  | Give a cautious overall interpretation of results considering objectives, limitations, multiplicity of analyses, results from similar studies, and other relevant evidence                                   | Yes (11)                              |
| Generalisability | 21  | Discuss the generalisability (external validity) of the study results                                                                                                                                        | Yes (11)                              |
| Funding          | 22  | Give the source of funding and the role of the funders for the present study and, if applicable, for the original study on which the present article is based                                                | Yes (16)                              |

1  
2 \*Give information separately for cases and controls in case-control studies and, if applicable, for exposed and  
3 unexposed groups in cohort and cross-sectional studies.  
4

5 **Note:** An Explanation and Elaboration article discusses each checklist item and gives methodological background and  
6 published examples of transparent reporting. The STROBE checklist is best used in conjunction with this article (freely  
7 available on the Web sites of PLoS Medicine at <http://www.plosmedicine.org/>, Annals of Internal Medicine at  
8 <http://www.annals.org/>, and Epidemiology at <http://www.epidem.com/>). Information on the STROBE Initiative is  
9 available at [www.strobe-statement.org](http://www.strobe-statement.org).  
10  
11  
12  
13  
14  
15  
16  
17  
18  
19  
20  
21  
22  
23  
24  
25  
26  
27  
28  
29  
30  
31  
32  
33  
34  
35  
36  
37  
38  
39  
40  
41  
42  
43  
44  
45  
46  
47  
48  
49  
50  
51  
52  
53  
54  
55  
56  
57  
58  
59  
60

# BMJ Open

## Short-Term Abstinence from Alcohol and Changes in Cardiovascular Risk Factors, Liver Function Tests and Cancer-Related Growth Factors: A Prospective Observational Study

|                                 |                                                                                                                                                                                                                                                                                                                                                                                                                                                                                                                                                                                                                                                                                                                                                                                                                                                                                                                                                                                                                                                                                                                                                                  |
|---------------------------------|------------------------------------------------------------------------------------------------------------------------------------------------------------------------------------------------------------------------------------------------------------------------------------------------------------------------------------------------------------------------------------------------------------------------------------------------------------------------------------------------------------------------------------------------------------------------------------------------------------------------------------------------------------------------------------------------------------------------------------------------------------------------------------------------------------------------------------------------------------------------------------------------------------------------------------------------------------------------------------------------------------------------------------------------------------------------------------------------------------------------------------------------------------------|
| Journal:                        | <i>BMJ Open</i>                                                                                                                                                                                                                                                                                                                                                                                                                                                                                                                                                                                                                                                                                                                                                                                                                                                                                                                                                                                                                                                                                                                                                  |
| Manuscript ID                   | bmjopen-2017-020673.R1                                                                                                                                                                                                                                                                                                                                                                                                                                                                                                                                                                                                                                                                                                                                                                                                                                                                                                                                                                                                                                                                                                                                           |
| Article Type:                   | Research                                                                                                                                                                                                                                                                                                                                                                                                                                                                                                                                                                                                                                                                                                                                                                                                                                                                                                                                                                                                                                                                                                                                                         |
| Date Submitted by the Author:   | 02-Mar-2018                                                                                                                                                                                                                                                                                                                                                                                                                                                                                                                                                                                                                                                                                                                                                                                                                                                                                                                                                                                                                                                                                                                                                      |
| Complete List of Authors:       | Mehta, Gautam; UCL, Institute for Liver and Digestive Health<br>Macdonald, Stewart; UCL, Institute for Liver and Digestive Health<br>Cronberg, Alexandra; Camden and Islington Public Health<br>Rosselli, Matteo; UCL, Institute for Liver and Digestive Health<br>Khera-Butler, Tanya; Camden and Islington Public Health<br>Sumpter, Colin; Camden and Islington Public Health<br>Al-Khatib, Safa; UCL, Institute for Liver and Digestive Health<br>Jain, Anjly; Royal Free London NHS Foundation Trust, Department of Clinical Biochemistry<br>Maurice, James; UCL, Institute for Liver and Digestive Health<br>Charalambous, Christos; UCL, Institute for Liver and Digestive Health<br>Gander, Amir; UCL, Tissue Access for Patient Benefit<br>Ju, Cynthia; McGovern Medical School, Department of Anesthesiology<br>Hakan, Talay; Royal Free Hampstead NHS Trust<br>Sherwood, Roy; King's College Hospital NHS Foundation Trust<br>Nair, Devaki; Royal Free London NHS Foundation Trust, Department of Clinical Biochemistry<br>Jalan, Rajiv; UCL, Institute for Liver and Digestive Health<br>Moore, Kevin; UCL, Institute for Liver and Digestive Health |
| <b>Primary Subject Heading</b>: | Gastroenterology and hepatology                                                                                                                                                                                                                                                                                                                                                                                                                                                                                                                                                                                                                                                                                                                                                                                                                                                                                                                                                                                                                                                                                                                                  |
| Secondary Subject Heading:      | Gastroenterology and hepatology, Public health                                                                                                                                                                                                                                                                                                                                                                                                                                                                                                                                                                                                                                                                                                                                                                                                                                                                                                                                                                                                                                                                                                                   |
| Keywords:                       | Alcohol, Insulin resistance, Cancer, Fatty liver                                                                                                                                                                                                                                                                                                                                                                                                                                                                                                                                                                                                                                                                                                                                                                                                                                                                                                                                                                                                                                                                                                                 |
|                                 |                                                                                                                                                                                                                                                                                                                                                                                                                                                                                                                                                                                                                                                                                                                                                                                                                                                                                                                                                                                                                                                                                                                                                                  |

SCHOLARONE™  
Manuscripts

# Short-Term Abstinence from Alcohol and Changes in Cardiovascular Risk Factors, Liver Function Tests and Cancer-Related Growth Factors: A Prospective Observational Study

Gautam Mehta, Stewart Macdonald, Alexandra Cronberg, Matteo Rosselli, Tanya Khera-Butler, Colin Sumpter, Safa Al-Khatib, Anjly Jain, James Maurice, Christos Charalambous, Amir Gander, Cynthia Ju, Talay Hakan, Roy Sherwood, Devaki Nair, Rajiv Jalan, Kevin Moore

1. Gautam Mehta PhD MRCP, Honorary Consultant and Senior Lecturer, UCL Institute for Liver and Digestive Health, Division of Medicine, Royal Free Campus, Rowland Hill Street, London NW3 2PF, UK. \*Corresponding author: gautam.mehta@ucl.ac.uk. Telephone: 07715232734.
2. Stewart Macdonald MRCP, Research Fellow, UCL Institute for Liver and Digestive Health, Division of Medicine, Royal Free Campus, Rowland Hill Street, London NW3 2PF, UK.
3. Alexandra Cronberg MSc, Senior Public Health Information Analyst, Camden and Islington Public Health, Islington Town Hall, 222 Upper Street, London N1 1XR, UK.
4. Matteo Rosselli MD, Senior Research Fellow, UCL Institute for Liver and Digestive Health, Division of Medicine, Royal Free Campus, Rowland Hill Street, London NW3 2PF, UK.
5. Tanya Khera-Butler MSc, Public Health Information Analyst, Camden and Islington Public Health, Islington Town Hall, 222 Upper Street, London, N1 1XR, UK.
6. Colin Sumpter MSc, Public Health Strategist, Camden and Islington Public Health, Islington Town Hall, 222 Upper Street, London, N1 1XR, UK.
7. Safa Al Khatib MSc, Postgraduate student, UCL Institute for Liver and Digestive Health, Division of Medicine, Royal Free Campus, Rowland Hill Street, London NW3 2PF, UK.
8. Anjly Jain MD, Research Fellow, Department of Clinical Biochemistry, Royal Free London NHS Foundation Trust, Pond Street, London NW3 2QG, UK.
9. James Maurice MRCP, Research Fellow, UCL Institute for Liver and Digestive Health, Division of Medicine, Royal Free Campus, Rowland Hill Street, London NW3 2PF, UK.
10. Christos Charalambous, Undergraduate student, UCL Institute for Liver and Digestive Health, Division of Medicine, Royal Free Campus, Rowland Hill Street, London NW3 2PF, UK.
11. Amir Gander PhD, Director of UCL Tissue Access for Patient Benefit, Royal Free Campus, Rowland Hill Street, London NW3 2PF, UK.
12. Cynthia Ju PhD, Professor and Vice Chair for Research, Department of Anesthesiology, McGovern Medical School, University of Texas Health Science Center at Houston, Texas 77030, USA.
13. Talay Hakan, Fibroscan Technician, Royal Free London NHS Foundation Trust, Pond Street, London NW3 2QG, UK.
14. Roy Sherwood DPhil, Professor of Clinical Biochemistry, King's College Hospital NHS Foundation Trust, Denmark Hill, London SE5 9RS, UK.
15. Devaki Nair FRCPath, Clinical Lead for Clinical Biochemistry, Department of Clinical Biochemistry, Royal Free London NHS Foundation Trust, Pond Street, London NW3 2QG, UK.
16. Rajiv Jalan FRCP, Professor of Hepatology, UCL Institute for Liver and Digestive Health, Division of Medicine, Royal Free Campus, Rowland Hill Street, London NW3 2PF, UK.
17. Kevin Moore FRCP, Professor of Hepatology, UCL Institute for Liver and Digestive Health, Division of Medicine, Royal Free Campus, Rowland Hill Street, London NW3 2PF, UK. \*Senior author.

**Keywords:** Alcohol, Insulin Resistance, Cancer, Fatty Liver.

**Word count:** 2793 (excluding title page, abstract, acknowledgements, references, tables and figures).

**Number of figures:** 3. **Number of tables:** 3.

## **Abstract**

**Objective:** To assess changes in metabolic risk factors and cancer-related growth factors associated with short-term abstinence from alcohol.

**Design:** Prospective, observational study.

**Setting:** Single tertiary centre.

**Participants:** Healthy subjects were recruited based on intention to: (i) abstain from alcohol for one month (abstinence group), or (ii) continue to drink alcohol (control group). Inclusion criteria were baseline alcohol consumption >64g/week (males) or >48g/week (females). Exclusion criteria were known liver disease or alcohol dependence.

**Primary and secondary outcome measures:** The primary outcome was change in insulin resistance (HOMA score). Secondary outcomes were changes in weight, blood pressure, VEGF, EGF, and liver function tests. Primary and secondary outcomes were adjusted for changes in diet, exercise, and cigarette smoking.

**Results:** The abstinence group comprised 94 participants (mean age 45.5 years, SD±1.2) and the control group 47 participants (mean age 48.7 years, SD±1.8). Baseline alcohol consumption in the abstinence group was 258.2g/week, SD±9.4, and in the control group 233.8g, SD±19.0. Significant reductions from baseline in the abstinence group (all  $p<0.001$ ) were found in: HOMA score (-25.9%, IQR -48.6 to +0.3%), systolic blood pressure (-6.6%, IQR -11.8% to 0.0%), diastolic blood pressure (-6.3%, IQR -14.1% to +1.3%), weight (-1.5%, IQR -2.9% to -0.4%), VEGF (-41.8%, IQR -64.9% to -17.9%) and EGF (-73.9%, IQR -86.1% to -36.4%). None of these changes were associated with changes in diet, exercise or cigarette smoking.



1  
2  
3 No significant changes from baseline in primary or secondary outcomes were noted  
4  
5 in the control group.

6  
7 **Conclusion:** These findings demonstrate that abstinence from alcohol in moderate-  
8  
9 heavy drinkers improves insulin resistance, weight, blood pressure and cancer-  
10  
11 related growth factors. These data support an independent association of alcohol  
12  
13 consumption with cancer risk, and suggest an increased risk of metabolic diseases  
14  
15 such as type 2 diabetes and fatty liver disease.  
16  
17

### 18 19 20 **Strengths and limitations of this study**

#### 21 22 **Strengths:**

- 23 - Prospective study design
- 24 - Recruitment of a control group
- 25 - Thorough characterization of the biological and lifestyle confounders

#### 26 27 28 **Limitations:**

- 29 - Lack of randomization to groups
- 30 - Study cohort all from university teaching hospital or science magazine.

31  
32  
33  
34  
35  
36  
37  
38  
39 **Funding:** This work was funded by the Royal Free Charity, Camden and Islington  
40  
41 Public Health, and the Royal Free London NHS Foundation Trust.  
42  
43

44  
45  
46 **Competing interests declaration:** None of the authors, or their spouses/children,  
47  
48 have a financial relationship with any organization(s) that might have an interest in  
49  
50 the submitted work in the previous three years, or any other relationship/activity that  
51  
52 could appear to have influenced this work.  
53  
54  
55  
56  
57  
58  
59

1  
2  
3 **Data sharing statement:** All raw data is available on request from the  
4  
5 corresponding author.  
6  
7

## 8 9 **Introduction**

10 Alcohol is a major cause of disability and preventable death. Globally, alcohol is the  
11  
12 seventh leading risk factor overall in terms of disability-adjusted life years (DALYs),  
13  
14 and is the leading risk factor globally in working age individuals (ages 15-59).  
15  
16 Moreover, alcohol use attributable DALYs have increased by over 25% in the last 25  
17  
18 years.[1] European countries have amongst the highest alcohol consumption.  
19  
20 Eastern Europe has the highest *per capita* consumption worldwide,[2] and in the UK  
21  
22 over 25% of the adult population drink in excess of recommended guidelines.[3]  
23  
24  
25  
26  
27

28  
29 Aside from liver disease, which is the 3<sup>rd</sup> commonest cause of preventable death in  
30  
31 the UK, there is also a significant burden from alcohol-related cancer and metabolic  
32  
33 syndrome.[3] Alcohol has been classified by the WHO as a class I carcinogen for  
34  
35 some decades, and a report from the World Cancer Research Fund/American  
36  
37 Institute for Cancer Research states that there is convincing evidence that alcohol is  
38  
39 causally related to cancers of the oral cavity, pharynx, larynx, oesophagus, breast  
40  
41 and colorectum.[4]  
42  
43  
44  
45

46 Moreover, it has long been recognized that there is an important interaction between  
47  
48 alcohol misuse and fatty liver disease.[5] One of the main factors driving the  
49  
50 development of fatty liver disease and steatohepatitis is insulin resistance. Thus, any  
51  
52 action that improves insulin resistance will have a major impact on the development  
53  
54 and severity of fatty liver disease. However, there remains debate as to the impact of  
55  
56  
57  
58  
59  
60

1  
2  
3 alcohol consumption on fatty liver disease driven predominantly by insulin resistance  
4  
5 and metabolic factors. [6,7]  
6  
7  
8

9 In this climate of increased awareness of alcohol-related morbidity, the UK Chief  
10 Medical Officers have revised downwards their weekly guidance limits.[8]  
11  
12 Additionally, public health campaigns, where non-dependent drinkers are  
13 encouraged to commit to short-term abstinence from alcohol, are increasingly  
14 common. The aim of this study was to assess changes in insulin resistance,  
15 metabolic risk factors and cancer-related growth factors with short-term abstinence  
16 from alcohol in moderate drinkers.  
17  
18  
19  
20  
21  
22  
23  
24  
25

## 26 **Methods**

27  
28 **Study Design:** This was a single-centre, prospective, observational study conducted  
29 at the Royal Free London NHS Foundation Trust. Ethical approval was granted by  
30 the NRES Committee (14/NW/1510), and written informed consent was obtained  
31 from all participants. Study recruitment was initiated through email advertising within  
32 University College London, Queen Mary University of London, and New Scientist  
33 Magazine. The entry criteria were baseline alcohol consumption of >64g/week (8  
34 units) for males or >48g/week (6 units) for females. Exclusion criteria were >3 days  
35 abstinence from alcohol prior to commencement of the study, the presence of known  
36 liver disease or alcohol dependence. Participants were not randomized to group, but  
37 were allocated based on intention to maintain abstinence for one month (abstinence  
38 group) or to continue alcohol consumption (control group).  
39  
40  
41  
42  
43  
44  
45  
46  
47  
48  
49  
50  
51  
52  
53  
54  
55  
56  
57  
58  
59  
60

1  
2  
3 Participants were assessed at baseline, and after one-month. The primary outcome  
4 was change in insulin resistance (HOMA score) at baseline and one-month.  
5  
6 Secondary outcomes were changes in weight, blood pressure, VEGF, EGF and liver  
7 function tests. Information on diet, exercise, and smoking history were obtained by  
8 self-reporting using components of the SLIQ lifestyle questionnaire[9]. Self-reported  
9 alcohol intake was assessed at baseline using the full AUDIT questionnaire, and a  
10 direct interview by a single interviewer (KM) was also conducted to assess alcohol  
11 intake over the preceding two-months, using the timeline follow back method.[10]  
12  
13 Additionally, a follow-up telephone interview was conducted at 6-8 months to  
14 determine drinking habits following the study period, using the full AUDIT  
15 questionnaire (modified to capture data for the preceding 6-8 months).  
16  
17  
18  
19  
20  
21  
22  
23  
24  
25  
26  
27

28  
29 Sample size calculation for the control group was performed, based on pre/post data  
30 acquired from the abstinence group (table 1). Specifically, based on this data, a  
31 power calculation determined that the following sample sizes were required to detect  
32 statistically significant differences of the same magnitude (80% power, alpha 5%, 2-  
33 sided test): HOMA score n=47, weight n=21, VEGF n=31, EGF n=30.  
34  
35  
36  
37  
38  
39  
40  
41

42 Blood pressure (BP) was measured seated, following a 2-minute rest period, and the  
43 mean of three measurements was recorded. Fasting blood was taken, between 8am  
44 and midday, for measurement of glucose, insulin, liver function tests, lipids,  
45 carbohydrate deficient transferrin (abstinence group only) and VEGF (isoforms 165,  
46 145 and 121) and EGF (Randox Investigator, Randox, Belfast, UK). The HOMA  
47 score was calculated according to the methods of Matthews et al.[11] Participants  
48 with diabetes requiring treatment were excluded from HOMA measurements.  
49  
50  
51  
52  
53  
54  
55  
56  
57  
58  
59  
60

1  
2  
3  
4  
5 **Statistical analysis:** Baseline and one-month differences were analysed by paired t-  
6  
7 test for normally distributed differences in continuous variables, by Wilcoxon signed  
8  
9 rank test for not normally distributed differences in continuous variables, and  
10  
11 differences in categorical variables by Chi-square test. Differences between  
12  
13 abstinence and control groups were analysed by unpaired t-test for normally  
14  
15 distributed variables, and Mann-Whitney test for variables that were not normally  
16  
17 distributed. Lifestyle factors were categorically graded (better/same/worse), and  
18  
19 delta change in biological variables between lifestyle groups was assessed by  
20  
21 Kruskal-Wallis test. Multivariable logistic regression analysis was also used to test  
22  
23 the effect of abstinence on improvement in HOMA, weight, blood pressure, VEGF  
24  
25 and EGF once other lifestyle factors (diet and exercise) were taken into account.  
26  
27 Correlation between biological variables was assessed by Spearman's correlation.  
28  
29 All analyses were performed using STATA version 13.1 and SPSS Statistics version  
30  
31 21.0. Standard deviation (SD) is reported for means and interquartile range (IQR) for  
32  
33 medians where applicable. All p values are 2 sided;  $p < 0.01$  was considered  
34  
35 significant to account for multiple comparisons.  
36  
37  
38  
39  
40  
41

42 **Patient and Public Involvement:** The research question was developed following public  
43  
44 feedback to a pilot project, conducted in collaboration with, and published by, New Scientist  
45  
46 magazine (New Scientist, 31<sup>st</sup> December 2013). Additionally, the research question was  
47  
48 informed by focus groups, funded through the NIHR Enabling Involvement Fund. No specific  
49  
50 patient advisers were involved in the design or conduct of the study. Results of the study will  
51  
52 be disseminated to all participants by email.  
53  
54  
55  
56  
57  
58  
59  
60

## **Results**

Ninety-seven participants were recruited to the abstinence group, and forty-eight participants to the control group. Three subjects in the abstinence group and one subject in the control group did not attend for follow-up. Thus, the final abstinence group comprised ninety-four participants (43 male, 51 female) mean age 45.5 years, SD±1.2, and the control group comprised 47 participants (22 male, 25 female) mean age 48.7 years, SD±1.8. Mean baseline alcohol intake for the abstinence group was 258.2g/week, SD±9.4 (men 275.9, SD±25.5; women 243.1, SD±12.8). All subjects in this group, except one individual, remained abstinent for the study period - this participant was included in all analyses. Mean weekly baseline alcohol intake for the control group was 233.8g, SD±19.0 (men 270.2, SD±26.6; women 200.2, SD±25.8), and was not significantly different at one-month 260.1g, SD±20.8 (men 286.4, SD±26.6; women 235.8, SD±31.1),  $p=0.11$ . A flowchart of participants and observations is shown in figure 1.

Baseline and one-month variables for the abstinence and control groups are listed in table 1. There were no significant differences in baseline characteristics between abstinence and control groups, aside from baseline blood pressure which was significantly lower in the control group (systolic bp: 135.8 SD±1.9mmHg vs 125.7 SD±2.0mmHg,  $p<0.01$ ; diastolic bp: 87.7 SD±1.2mmHg vs 74.3.7 SD±1.5mmHg,  $p<0.01$ ). Anti-hypertensives were used in one participant in the abstinence group, and one participant in the control group. Lipid-lowering agents were used in two participants in the abstinence group, one subject in the control group. These participants were excluded from analyses for blood pressure and lipids respectively. Significant reductions from baseline (pre vs post) in the abstinence group were

1  
2  
3 observed in: HOMA score (-25.9%, IQR -48.6 to +0.3%), systolic blood pressure (-  
4 6.6%, IQR -11.8% to 0.0%), diastolic blood pressure (-6.3%, IQR -14.1% to +1.3%)  
5 and weight (-1.5%, IQR -2.9% to -0.4%). HOMA score was not performed due to  
6 type 1 diabetes in one participant in the abstinence group. By chance, no  
7 participants had type 2 diabetes. Levels of VEGF and EGF also markedly reduced  
8 in the abstinence group, at -41.8% (IQR -64.9% to -17.9%) and -73.9% (IQR -86.1%  
9 to -36.4%) respectively (figure 2). Serum lipids (pre vs post) also improved in the  
10 abstinence group: fasting total serum cholesterol (-13.4%, IQR -18.9% to -2.7%),  
11 LDL cholesterol (-9.4%, IQR -20.1% to +4.8%), HDL cholesterol (-16.7%, IQR -  
12 25.0% to 0.0%). All the above variables were significantly reduced from baseline,  
13  $p < 0.001$ . By contrast, the control group did not show significant changes from  
14 baseline in any of the above variables. Changes from baseline in HOMA score,  
15 VEGF, EGF, weight, systolic and diastolic blood pressure are shown in figure 3.  
16  
17  
18  
19  
20  
21  
22  
23  
24  
25  
26  
27  
28  
29  
30  
31  
32  
33  
34  
35  
36  
37  
38  
39  
40  
41  
42  
43  
44  
45  
46  
47  
48  
49  
50  
51  
52  
53  
54  
55  
56  
57  
58  
59  
60

**Table 1: Baseline and one-month variables for abstinence and control groups.**

| Variable [units]                                      | Abstinence group                     |                     |                     |                       |             | Control Group                        |                     |                     |                       |             |
|-------------------------------------------------------|--------------------------------------|---------------------|---------------------|-----------------------|-------------|--------------------------------------|---------------------|---------------------|-----------------------|-------------|
|                                                       | Number of paired values <sup>a</sup> | Baseline            | One-month           | p-value (pre vs post) | Effect size | Number of paired values <sup>a</sup> | Baseline            | One-month           | p-value (pre vs post) | Effect size |
| HOMA score [median (IQR)]                             | 86                                   | 1.4 (1.0-2.1)       | 1.0 (0.7-1.4)       | p<0.001               | -0.40       | 47                                   | 1.2 (0.9-1.5)       | 1.1 (0.9-1.5)       | p=0.42                | -0.08       |
| Systolic blood pressure [mmHg, median (IQR)]          | 93                                   | 136.0 (121.0-147.5) | 125.0 (115.0-141.0) | p<0.001               | -0.57       | 47                                   | 121.0 (118.0-134.0) | 122.0 (116.0-131.0) | p=0.17                | -0.14       |
| Diastolic blood pressure [mmHg, mean (SD)]            | 93                                   | 89.0 (80.0-95.5)    | 82.0 (77.0-89.0)    | p<0.001               | -0.34       | 47                                   | 71.0 (68.0-80.0)    | 75.0 (68.0-80.0)    | p=0.77                | -0.03       |
| Weight [kg, median (IQR)]                             | 89                                   | 81.1 (67.0-89.7)    | 79.5 (66.7-87.2)    | p<0.001               | -0.49       | 47                                   | 73.8 (65.2-85.0)    | 72.6 (64.9-84.6)    | p=0.09                | -0.18       |
| VEGF [ng/L, median (IQR)]                             | 81                                   | 7.6 (5.5-16.0)      | 4.0 (3.1-5.8)       | p<0.001               | -0.55       | 41                                   | 13.4 (9.0-17.9)     | 12.9 (8.3-18.5)     | p=0.34                | -0.10       |
| EGF [ng/L, median (IQR)]                              | 81                                   | 7.2 (3.6-13.5)      | 1.5 (1.0-2.5)       | p<0.001               | -0.56       | 41                                   | 3.8 (1.0-10.3)      | 4.9 (1.0-9.5)       | p=0.55                | -0.07       |
| Total Cholesterol [mg/dL, median (IQR)]               | 88                                   | 228.7 (198.4-258.4) | 202.1 (176.3-227.4) | p<0.001               | -0.85       | 47                                   | 208.8 (177.9-232.0) | 205.0 (177.9-239.8) | p=0.25                | -0.12       |
| LDL [mg/dL, median (IQR)]                             | 88                                   | 131.5 (112.3-163.1) | 127.0 (97.4-153.8)  | p<0.001               | -0.42       | 47                                   | 112.1 (88.9-139.2)  | 112.1 (85.1-143.1)  | p=0.16                | -0.15       |
| HDL [mg/dL, median (IQR)]                             | 88                                   | 74.4 (±22.3)        | 60.9 (±17.8)        | p<0.001               | -0.57       | 47                                   | 73.5 (58.0-88.9)    | 73.5 (58.0-92.8)    | p=0.95                | -0.02       |
| Triglycerides [mg/dL, median (IQR)]                   | 88                                   | 79.3 (57.6-115.8)   | 76.6 (60.4-103.2)   | p=0.05                | -0.15       | 47                                   | 79.7 (62.0-124.0)   | 79.7 (62.0-106.3)   | p=0.70                | -0.05       |
| Gamma GT [IU/L, median (IQR)]                         | 92                                   | 22.5 (14.0-34.8)    | 15.0 (10.3-24.0)    | p<0.001               | -0.53       | 46                                   | 39.8±8.3            | 44.8±11.0           | p=0.26                | -0.12       |
| ALT [IU/L, median (IQR)]                              | 94                                   | 25.0 (18.0-37.0)    | 20.0 (16.0-29.3)    | p<0.001               | -0.29       | 47                                   | 24.0 (18.0-31.0)    | 25.0 (20.0-33.0)    | p=0.06                | -0.21       |
| AST [IU/L, median (IQR)]                              | 94                                   | 23.0 (19.0-28.0)    | 21.0 (18.0-27.0)    | p=0.03                | -0.16       | 47                                   | 20.0 (17.0-24.0)    | 22.0 (19.0-27.0)    | p<0.01                | -0.27       |
| Carbohydrate deficient transferrin [% , median (IQR)] | 81                                   | 0.7 (0.5-1.1)       | 0.6 (0.4-0.8)       | p<0.001               | -0.32       | n/a                                  | n/a                 | n/a                 | n/a                   | n/a         |

Effect size for normally distributed variables is calculated as [mean change in variable]/SD. Effect size for non-normally distributed variables is calculated as Wilcoxon signed rank [test statistic] / √ [number of observations].

Abbreviations: HOMA, homeostatic model assessment; VEGF, vascular endothelial growth factor; EGF, epidermal growth factor; LDL, low density lipoprotein; HDL, high density lipoprotein; ALT, alanine aminotransferase; AST aspartate aminotransferase.

<sup>a</sup>Where the number of paired observations is less than 94 (abstinence group) or 47 (control group), this is due to missing data points.



1  
2  
3 Liver function tests also improved in the abstinence group, thus, there was a  
4 significant reduction in serum ALT (-14.5%, IQR -28.9 to +6.7%,  $p < 0.001$ ) and  
5 gamma GT (-28.6%, IQR -43.5 to -14.4%,  $p < 0.001$ ), and a trend towards reduction  
6 in serum AST (-5.4%, IQR -16.2 to +9.5%,  $p = 0.03$ ). No significant change in these  
7 variables was seen in the control group, aside from a small rise in AST (+4.5%, IQR  
8 -5.6 to +23.1%,  $p < 0.01$ ).

9  
10  
11  
12  
13  
14  
15  
16  
17  
18 Lifestyle factors did not account for changes in the abstinence group. No changes  
19 were seen in exercise score (10.9 SD $\pm$ 4.7 vs 10.7 SD $\pm$ 4.6,  $p = 0.82$ ) or cigarette  
20 smoking (1.3 SD $\pm$ 0.7 vs 1.4 SD $\pm$ 0.7,  $p = 0.17$ ). A small change in diet score was  
21 noted (from 8.2 SD $\pm$ 3.3 to 8.8 SD $\pm$ 3.0,  $p = 0.03$ ). The pre/post differences in HOMA  
22 score, weight, VEGF, EGF, triglycerides and HDL were distributed with a left  
23 (negative) skew. Therefore, non-parametric approaches were adopted to account for  
24 lifestyle variables. Changes in HOMA score, BP, and weight in the abstinence group  
25 were not associated with changes in any lifestyle score (supplemental table 1).  
26 There was also no association between changes in HOMA score and weight ( $r = 0.04$ ,  
27  $p = 0.73$ ). However, changes in total cholesterol and LDL cholesterol attained  
28 borderline significance between groups when compared by change in diet in the  
29 abstinence group (supplemental table 1;  $p = 0.01$  and  $p = 0.02$  respectively).

30  
31  
32  
33  
34  
35  
36  
37  
38  
39  
40  
41  
42  
43  
44  
45  
46 Additionally, multivariable logistic regression analysis was used across the whole  
47 cohort, combining the abstinence and control groups, to determine predictors of:  
48 HOMA score reduction  $\geq 20\%$ , systolic bp reduction  $\geq 5\%$ , weight reduction  $\geq 2\%$ ,  
49 VEGF reduction  $\geq 20\%$ , EGF reduction  $\geq 20\%$ . The model used covariates of  
50 abstinence (yes/no) or change in exercise and diet SLIQ score (better/same/worse).  
51  
52  
53  
54  
55  
56  
57  
58  
59  
60

1  
2  
3 Abstinance was a highly significant predictor of improvement in these biological  
4 variables (all  $p < 0.01$ ). By contrast, change in exercise and diet score was not  
5 associated with improvement in any of these variables (table 2).  
6  
7  
8  
9

10  
11 A further important result relates to follow-up questionnaire data, obtained in 77  
12 individuals (81.9%) in the abstinence group and 40 (83.3%) in the control group, at  
13 6-8 months following the study period. In the abstinence group, a significant  
14 reduction in alcohol consumption was maintained from their pre-study assessment.  
15 Thus, there was a significant reduction in overall AUDIT score from 10.0 (IQR 7.0 to  
16 15.0) to 7.0 (IQR 5.0 to 9.0),  $p < 0.001$ , and in the proportion of individuals with  
17 harmful use of alcohol (AUDIT score  $> 8$ ) (61.0% vs 28.5%,  $p < 0.001$ ) at 6-8 months  
18 compared with baseline. By contrast, in the control group there was a non-significant  
19 trend to reduction in overall AUDIT score from 8.5 (IQR 6.3 to 12.0) to 8.0 (IQR 6.0  
20 to 10.8),  $p = 0.06$ , and no significant change in the proportion with harmful use (50%  
21 vs 40%,  $p = 0.37$ ).  
22  
23  
24  
25  
26  
27  
28  
29  
30  
31  
32  
33  
34  
35  
36  
37  
38  
39  
40  
41  
42  
43  
44  
45  
46  
47  
48  
49  
50  
51  
52  
53  
54  
55  
56  
57  
58  
59  
60

**Table 2: Independent predictors of improvement in HOMA score, systolic bp, weight, VEGF and EGF**

| Biological variable (target reduction)               | All study participants (n=141) |                |         |
|------------------------------------------------------|--------------------------------|----------------|---------|
|                                                      | Odds Ratio                     | 95% CI         | p value |
| <b>HOMA score (reduction <math>\geq 20\%</math>)</b> |                                |                |         |
| Abstinence                                           | 3.48                           | 1.60 - 7.53    | p=0.002 |
| Exercise + diet SLIQ score                           | 0.87                           | 0.43 - 1.77    | p=0.694 |
| <b>Systolic bp (reduction <math>\geq 5\%</math>)</b> |                                |                |         |
| Abstinence                                           | 6.47                           | 2.71 - 15.46   | p<0.001 |
| Exercise + diet SLIQ score                           | 1.47                           | 0.70 - 3.08    | p=0.310 |
| <b>Weight (reduction <math>\geq 2\%</math>)</b>      |                                |                |         |
| Abstinence                                           | 15.63                          | 3.54 - 68.95   | p<0.001 |
| Exercise + diet SLIQ score                           | 0.74                           | 0.323 - 1.69   | 0.475   |
| <b>VEGF (reduction <math>\geq 20\%</math>)</b>       |                                |                |         |
| Abstinence                                           | 4.35                           | 1.93 - 9.81    | p<0.001 |
| Exercise + diet SLIQ score                           | 2.17                           | 0.97 - 4.86    | p=0.59  |
| <b>EGF (reduction <math>\geq 20\%</math>)</b>        |                                |                |         |
| Abstinence                                           | 48.81                          | 15.26 - 156.06 | p<0.001 |
| Exercise + diet SLIQ score                           | 2.52                           | 0.80 - 7.95    | p=0.115 |

Results are presented as adjusted odds ratios and 95% confidence intervals using multivariable logistic regression analysis. Abbreviations: OR, odds ratio; CI, confidence interval; HOMA, homeostatic model assessment; VEGF, vascular endothelial growth factor; EGF, epidermal growth factor.

## **Discussion**

This study is the first to comprehensively assess the effects of short-term abstinence from alcohol in a population of 'healthy' individuals, who are representative of the 25% of the wider population who drink alcohol above national guidelines. The key findings of this study are improvements in insulin resistance, blood pressure, body weight, and a decrease in circulating concentrations of cancer-related growth factors following a month of abstinence from alcohol.

The strengths of this study are the prospective study design, the recruitment of a control group, and the thorough characterization of the participant's biological and lifestyle data. A weakness is the lack of randomization of groups, although for ethical reasons the allocation of individuals to a pre-defined alcohol consumption regimen was inappropriate. A further weakness relates to the study cohort, who were recruited through staff at university teaching hospitals and a science magazine, and thus probably had higher educational attainment and health-related motivation than the average population. A further confounder is the possibility of lifestyle change in the abstinence group, alongside abstinence from alcohol. We have tried to minimize the impact of these using the SLIQ questionnaire, a self-reported measure of lifestyle factors contributing to metabolic risk with good re-test reliability.[9] As such, changes in HOMA score, weight and blood pressure were independent of changes in lifestyle as measured by the SLIQ score. Nevertheless, it remains possible that the questionnaire scoring for diet, exercise and cigarette smoking has inadequate sensitivity for all lifestyle changes within this cohort.

1  
2  
3 The primary endpoint of insulin resistance, measured by HOMA score, showed a  
4 marked decrease (~25%) following the cessation of alcohol consumption. Some  
5 previous epidemiological data has supported a protective effect of low-dose alcohol  
6 use on the risk of type 2 diabetes,[12] although more recent work suggests this may  
7 be due to incomplete adjustment for 'sick quitters'[13], and prospective alcohol  
8 intervention studies have provided mixed results.[14,15] Our data support a positive  
9 association of moderate-heavy alcohol use with an increased risk of type 2 diabetes.  
10 Moreover, the observed effects of abstinence on HOMA score noted in this study are  
11 too dramatic to be accounted for by weight loss alone, and no specific association  
12 was found between change in HOMA score and weight. To our knowledge, this is  
13 the first paper to prospectively demonstrate a link between excess alcohol  
14 consumption and insulin resistance.  
15  
16  
17  
18  
19  
20  
21  
22  
23  
24  
25  
26  
27  
28  
29  
30

31 A major novel finding of this study is the rapid decrease in serum VEGF and EGF  
32 with short-term abstinence from alcohol, which was seen in 90% of subjects in the  
33 abstinence group. Importantly, these changes were not seen in the control group  
34 with continued alcohol consumption. Alcohol is causally related to the development  
35 of several cancers, including the digestive tract, nasopharynx, liver and breast, and  
36 is classified as a class I carcinogen.[4,16] The increased risk caused by alcohol  
37 persists even at low-levels of consumption. The mechanism of mutagenesis is  
38 thought to relate to direct effects of the alcohol metabolite, acetaldehyde[4].  
39 However, in this study, we chose to study VEGF and EGF, since they are key  
40 molecules in the multi-step progression of cancer, are both highly expressed in the  
41 solid tumours listed above, and are common therapeutic targets for these  
42 tumours.[17] VEGF plays a key role in tumour progression through angiogenic  
43  
44  
45  
46  
47  
48  
49  
50  
51  
52  
53  
54  
55  
56  
57  
58  
59  
60

1  
2  
3 pathways, and VEGF expression is driven by oncogene expression (eg. Ras, src,  
4 HER2, EGFR).[18] EGF signalling contributes to oncogenesis by directly promoting  
5 cell proliferation,[19] and expression levels are correlated with progressive tumour  
6 growth and metastasis.[20-22]  
7  
8  
9  
10

11  
12  
13 Mechanistically, rodent models have demonstrated that alcohol exposure directly  
14 promotes the progression of several cancers, including breast cancer. Lu et al have  
15 shown, in a mouse model of breast cancer, that alcohol directly induces tumor  
16 angiogenesis and accelerated tumor growth through a VEGF-dependent  
17 mechanism.[23] Similar evidence for an alcohol-VEGF pathway exists in mouse  
18 models of colon cancer and melanoma.[24,25] The EGF pathway has also been  
19 implicated in alcohol-related breast cancer.[26-28] The baseline levels of VEGF and  
20 EGF reported in this study are lower than reported in other studies exploring  
21 associations of circulating VEGF/EGF levels with the occurrence of solid  
22 tumours.[29-31] These differences are explained by the method of sample collection.  
23 The collection of blood into EDTA tubes, as in this study, leads to reduced  
24 contribution of platelet-derived VEGF and EGF, and thus lower plasma  
25 concentrations.[32,33]  
26  
27  
28  
29  
30  
31  
32  
33  
34  
35  
36  
37  
38  
39  
40  
41  
42  
43

44 Here, we demonstrate for the first time in humans an association of abstinence from  
45 alcohol with a marked reduction in circulating concentrations of VEGF and EGF,  
46 which suggests that alcohol consumption *per se* increases the concentrations of  
47 these growth factors. There is strong evidence that these growth factors play an  
48 important role in oncogenesis. However, it would be wrong to speculate further on  
49  
50  
51  
52  
53  
54  
55  
56  
57  
58  
59  
60

1  
2  
3 this observation without longitudinal study in subjects who continue moderate alcohol  
4  
5 consumption.  
6  
7

8  
9 These data also show the dynamic effect of regular alcohol consumption on blood  
10  
11 pressure, an effect that is maintained in healthy individuals with no history of  
12  
13 hypertension requiring medication. An effect of alcohol on blood pressure has long  
14  
15 been recognized, with consumption greater than two daily doses considered to be  
16  
17 one of the most common reversible causes of hypertension.[34]  
18  
19

20  
21  
22 Collectively, the above findings have implications for the risk of synergistic liver injury  
23  
24 amongst individuals with risk factors for alcohol-related liver disease (ALD) and fatty  
25  
26 liver disease. Previous studies have emphasized an association between these  
27  
28 pathways of liver injury, since serum ALT amongst moderate drinkers is elevated to  
29  
30 a greater extent in those with higher BMI, and ALD and fatty liver are pathologically  
31  
32 similar. Two prospective cohort studies from Scotland have demonstrated an  
33  
34 increased risk of liver disease with alcohol use and elevated BMI.[35] More recently,  
35  
36 a large prospective study of over 100,000 women in the UK confirmed a synergistic  
37  
38 association between alcohol and high BMI and risk of chronic liver disease.[36]  
39  
40 Since alcohol use and insulin resistance are both directly implicated in the  
41  
42 development of steatohepatitis, the results of this study provide further support for  
43  
44 this common causal pathway. Further, changes in the gut microbiome have also  
45  
46 been implicated in the pathogenesis of steatohepatitis and obesity,[37] and therefore  
47  
48 changes in gut microbe populations following abstinence from alcohol are a further  
49  
50 possible explanation for the biological changes observed in this study. These  
51  
52 hypotheses merit further attention in subsequent mechanistic studies.  
53  
54  
55  
56  
57  
58  
59  
60

1  
2  
3  
4  
5 A frequent criticism of public health strategies of short-term abstinence (eg. Dry  
6 January) has been the lack of evidence of health benefits, or even negative effects  
7  
8 on longer-term alcohol consumption.  
9  
10

11  
12  
13 Although this study has demonstrated health benefits from short-term abstinence, a  
14 possible misrepresentation of these results is the concept that a 'detox' period is all  
15 that is required to 'refresh' the liver or achieve other health gains. This is clearly  
16 untrue, since the durability of the observed biological effects remains to be  
17 established. The data presented here provide supportive mechanistic evidence for  
18 the recent changes in alcohol guidance due to cancer risk, and the synergistic  
19 relationship between alcohol and metabolic syndrome. Further attention should be  
20 directed to determining the durability of these biological effects of abstinence, and  
21 conveying these complex public health messages to the public.  
22  
23  
24  
25  
26  
27  
28  
29  
30  
31  
32  
33  
34  
35  
36  
37  
38  
39  
40  
41  
42  
43  
44  
45  
46  
47  
48  
49  
50  
51  
52  
53  
54  
55  
56  
57  
58  
59  
60



**Contributors:**

GM contributed to study design, participated in data collection, wrote the analytical plan, and drafted and revised the paper. He is guarantor. SM participated in study design, participated in data collection, and drafted and revised the paper. AC and TKB analysed the data, and drafted and revised the paper. CS participated in study design, and revision of the paper. MR, SAK, AJ, CC, JM, AG and TH participated in data collection and revision of the paper. CJ, RS, DN and RJ contributed to study design, and revision of the paper. KM supervised the study, contributed to study design, participated in data collection and drafted and revised the paper.

**Acknowledgements:**

Administrative support for the study was provided by Ms Patricia Langley.

## References

1. GBD Risk Factors Collaborators. Global, regional, and national comparative risk assessment of 84 behavioural, environmental and occupational, and metabolic risks or clusters of risks, 1990–2016: a systematic analysis for the Global Burden of Disease Study 2016. *Lancet* 2017, 390:1345–422.
2. Rehm J, Samokhvalov AV, Shield KD. Global burden of alcoholic liver diseases. *J Hepatol* 2013; 59(1): 160–8.
3. Williams R, Aspinall R, Bellis M, et al. Addressing liver disease in the UK: a blueprint for attaining excellence in health care and reducing premature mortality from lifestyle issues of excess consumption of alcohol, obesity, and viral hepatitis. *Lancet* 2014; 384(9958): 1953–97.
4. LoConte NK, Brewster AM, Kaur JS, et al. Alcohol and cancer: a statement of the American Society of Clinical Oncology. *J Clin Oncol* 2018;36:83–93.
5. Becker U, Deis A, Sorensen TIA, et al. Prediction of risk of liver disease by alcohol intake, sex and age: a prospective population study. *Hepatology* 1996; 23:1025–9.
6. Dunn W, Sanyal AJ, Brunt EM, et al. Modest alcohol consumption is associated with decreased prevalence of steatohepatitis in patients with non-alcoholic fatty liver disease (NAFLD). *J Hepatol* 2012; 57:384–91.
7. Ekstedt M, Franzen LE, Holmqvist M, et al. Alcohol consumption is associated with progression of hepatic fibrosis in non-alcoholic fatty liver disease. *Scand J Gastroenterol* 2009; 44:366–74.
8. Department of Health. UK Chief Medical Officers' Alcohol Guidelines Review: Summary of the proposed new guidelines. [https://www.gov.uk/government/uploads/system/uploads/attachment\\_data/file/489795/summary](https://www.gov.uk/government/uploads/system/uploads/attachment_data/file/489795/summary)
9. Godwin M, Streight S, Dyachuk E, et al. Testing the Simple Lifestyle Indicator Questionnaire: Initial psychometric study. *Can Fam Physician* 2008; 54(1): 76–7.
10. Sobell LCS, M.B. Timeline follow-back: a technique for assessing self-reported ethanol consumption. *Measuring Alcohol Consumption: Psychosocial and Biological Methods*; 1992.
11. Matthews DR, Hosker JP, Rudenski AS, Naylor BA, Treacher DF, Turner RC. Homeostasis model assessment: insulin resistance and beta-cell function from fasting plasma glucose and insulin concentrations in man. *Diabetologia* 1985; 28(7): 412–9.
12. Baliunas DO, Taylor BJ, Irving H, et al. Alcohol as a risk factor for type 2 diabetes: a systematic review and meta-analysis. *Diabetes Care* 2009; 32(2):2123–32.
13. Knott C, Bell S, Britton A. Alcohol Consumption and the Risk of Type 2 Diabetes: A Systematic Review and Dose-Response Meta-analysis of More Than 1.9 Million Individuals From 38 Observational Studies. *Diabetes Care* 2015; 38(9): 1804–12
14. Schrieks IC, Heil AL, Hendriks HF, Mukamal KJ, Beulens JW. The effect of alcohol consumption on insulin sensitivity and glycemic status: a systematic review and meta-analysis of intervention studies. *Diabetes Care* 2015; 38(4): 723–32.
15. Gepner Y, Golan R, Harman-Boehm I, et al. Effects of Initiating Moderate Alcohol Intake on Cardiometabolic Risk in Adults With Type 2 Diabetes: A 2-Year Randomized, Controlled Trial. *Annals of Internal Medicine* 2015; 163(8):569–79.
16. Committee on Carcinogenicity of Chemicals in Food. Statement on consumption of alcoholic beverages and risk of cancer. <https://www.gov.uk/government/groups/committee-on-carcinogenicity-of-chemicals-in-food-consumer-products-and-the-environment-coc> 2015.
17. Taberner J. The role of VEGF and EGFR inhibition: implications for combining anti-VEGF and anti-EGFR agents. *Molecular Cancer Res* 2007; 5(3): 203–20.
18. Ferrara N, Gerber HP, LeCouter J. The biology of VEGF and its receptors. *Nat Med* 2003; 9(6): 669–76.
19. Arteaga CL. The epidermal growth factor receptor: from mutant oncogene in nonhuman cancers to therapeutic target in human neoplasia. *J Clin Oncol* 2001; 19(18 Suppl): 32S–40S.
20. De Jong KP, Stellema R, Karrenbeld A, et al. Clinical relevance of transforming growth factor alpha, epidermal growth factor receptor, p53, and Ki67 in colorectal liver metastases and corresponding primary tumors. *Hepatology* 1998; 28(4): 971–9.

- 1
  - 2
  - 3
  - 4
  - 5
  - 6
  - 7
  - 8
  - 9
  - 10
  - 11
  - 12
  - 13
  - 14
  - 15
  - 16
  - 17
  - 18
  - 19
  - 20
  - 21
  - 22
  - 23
  - 24
  - 25
  - 26
  - 27
  - 28
  - 29
  - 30
  - 31
  - 32
  - 33
  - 34
  - 35
  - 36
  - 37
  - 38
  - 39
  - 40
  - 41
  - 42
  - 43
  - 44
  - 45
  - 46
  - 47
  - 48
  - 49
  - 50
  - 51
  - 52
  - 53
  - 54
  - 55
  - 56
  - 57
  - 58
  - 59
  - 60
21. Lo HW, Hung MC. Nuclear EGFR signalling network in cancers: linking EGFR pathway to cell cycle progression, nitric oxide pathway and patient survival. *Brit J Cancer* 2006; 94(2): 184-8.
22. Bracher A, Cardona AS, Tauber S, et al. Epidermal growth factor facilitates melanoma lymph node metastasis by influencing tumor lymphangiogenesis. *J Invest Dermatol* 2013; 133(1): 230-8.
23. Lu Y, Ni F, Xu M, et al. Alcohol promotes mammary tumor growth through activation of VEGF-dependent tumor angiogenesis. *Oncology Letters* 2014; 8(2): 673-8.
24. Tan W, Bailey AP, Shparago M, et al. Chronic alcohol consumption stimulates VEGF expression, tumor angiogenesis and progression of melanoma in mice. *Cancer Biol Ther* 2007; 6(8): 1211-7.
25. Gu JW, Bailey AP, Sartin A, Makey I, Brady AL. Ethanol stimulates tumor progression and expression of vascular endothelial growth factor in chick embryos. *Cancer* 2005; 103(2): 422-31.
26. Ciaroni L, Mallepell S, Brisken C. Amphiregulin is an essential mediator of estrogen receptor alpha function in mammary gland development. *P Natl Acad Sci USA* 2007; 104(13): 5455-60.
27. Willmarth NE, Baillo A, Dziubinski ML, Wilson K, Riese DJ, 2nd, Ethier SP. Altered EGFR localization and degradation in human breast cancer cells with an amphiregulin/EGFR autocrine loop. *Cell Signal* 2009; 21(2): 212-9.
28. Meng Q, Gao B, Goldberg ID, Rosen EM, Fan S. Stimulation of cell invasion and migration by alcohol in breast cancer cells. *Biochem Bioph Res Co* 2000; 273(2): 448-53.
29. Burstein HJ, Chen YH, Parker LM, et al. VEGF as a marker for outcome among advanced breast cancer patients receiving anti-VEGF therapy with bevacizumab and vinorelbine chemotherapy. *Clin Cancer Res* 2008; 14(23): 7871-7.
30. Meggiato T, Plebani M, Basso D, Panozzo MP, Del Favero G. Serum growth factors in patients with pancreatic cancer. *Tumour Biol* 1999; 20(2): 65-71.
31. Yoon SS, Kim SH, Gonen M, et al. Profile of plasma angiogenic factors before and after hepatectomy for colorectal cancer liver metastases. *Ann Surg Oncol* 2006; 13(3): 353-62.
32. Webb NJ, Bottomley MJ, Watson CJ, Brenchley PE. Vascular endothelial growth factor (VEGF) is released from platelets during blood clotting: implications for measurement of circulating VEGF levels in clinical disease. *Clin Sci* 1998; 94(4): 395-404.
33. Yucel A, Karakus R, Cemalettin A. Effect of blood collection tube types on the measurement of human epidermal growth factor. *J Immunoass Immunoch* 2007; 28(1): 47-60.
34. Beilin LJ, Puddey IB. Alcohol and hypertension: an update. *Hypertension* 2006; 47(6): 1035-8.
35. Hart CL, Morrison DS, Batty GD, Mitchell RJ, Davey Smith G. Effect of body mass index and alcohol consumption on liver disease: analysis of data from two prospective cohort studies. *BMJ* 2010; 340: c1240.
36. Trembling PM, Apostolidou S, Gentry-Maharaj A, et al. Risk of chronic liver disease in post-menopausal women due to body mass index, alcohol and their interaction: a prospective nested cohort study within the United Kingdom Collaborative Trial of Ovarian Cancer Screening (UKCTOCS). *BMC Public Health* 2017; 17(1):603.
37. Henaoui-Mejia J, Elinav E, Jin C, et al. Inflammasome-mediated dysbiosis regulates progression of NAFLD and obesity. *Nature* 2012; 482(7384): 179-85.

1  
2  
3 **Figure 1: Flow chart of study participants.**  
4  
5

6  
7 **Figure 2: Baseline and one-month data for the abstinence group presented as**  
8 **pre/post scatterplot (left) and bar chart chart (right).**  
9

10 *Bar chart data are presented as median (IQR). Panels (clockwise from top right): HOMA score,*  
11 *weight, diastolic bp, EGF, VEGF, systolic bp. Baseline and one-month values were compared with*  
12 *Wilcoxon signed rank test,  $p < 0.01$  taken as level of significance. Abbreviations: HOMA, homeostatic*  
13 *model assessment; VEGF, vascular endothelial growth factor; EGF, epidermal growth factor; bp,*  
14 *blood pressure.*  
15

16  
17 **Figure 3: Percentage change from baseline in HOMA score, VEGF, EGF, systolic bp,**  
18 **diastolic bp and weight in abstinence (dark bar) and control (light bar) groups.**  
19

20 *Data are presented as median (IQR). Changes from baseline in abstinence and control groups were*  
21 *compared with Mann Whitney test,  $p < 0.01$  taken as level of significance. Abbreviations: HOMA,*  
22 *homeostatic model assessment; VEGF, vascular endothelial growth factor; EGF, epidermal growth*  
23 *factor; bp, blood pressure.*  
24  
25  
26  
27  
28  
29  
30  
31  
32  
33  
34  
35  
36  
37  
38  
39  
40  
41  
42  
43  
44  
45  
46  
47  
48  
49  
50  
51  
52  
53  
54  
55  
56  
57  
58  
59  
60

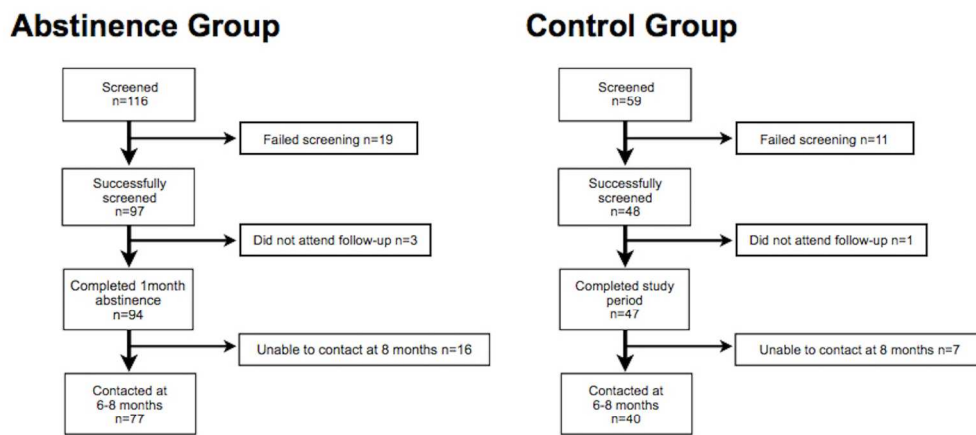

Figure 1: Flow chart of study participants

Figure 1: Flow chart of study participants.

147x78mm (300 x 300 DPI)

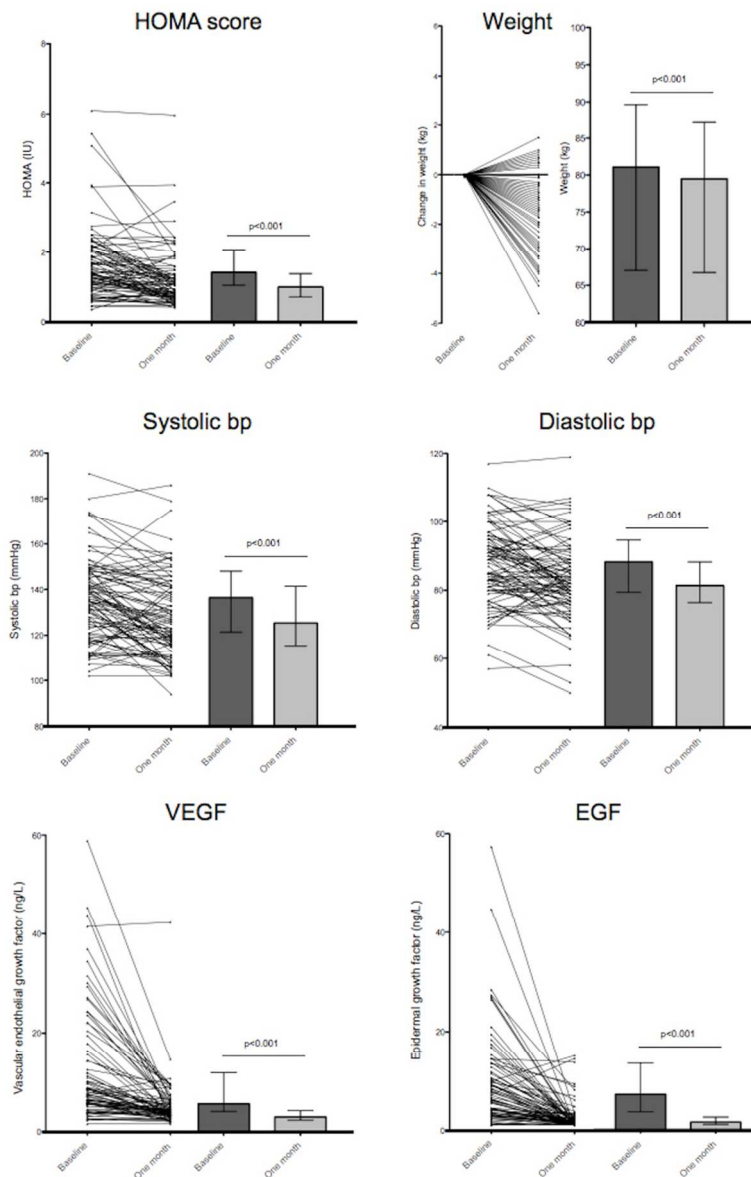

Figure 2: Baseline and one-month data for the abstinence group presented as pre/post scatterplot (left) and bar chart chart (right). !! † Bar chart data are presented as median (IQR). Panels (clockwise from top right): HOMA score, weight, diastolic bp, EGF, VEGF, systolic bp. Baseline and one-month values were compared with Wilcoxon signed rank test,  $p < 0.01$  taken as level of significance. Abbreviations: HOMA, homeostatic model assessment; VEGF, vascular endothelial growth factor; EGF, epidermal growth factor; bp, blood pressure.!! †

80x120mm (300 x 300 DPI)

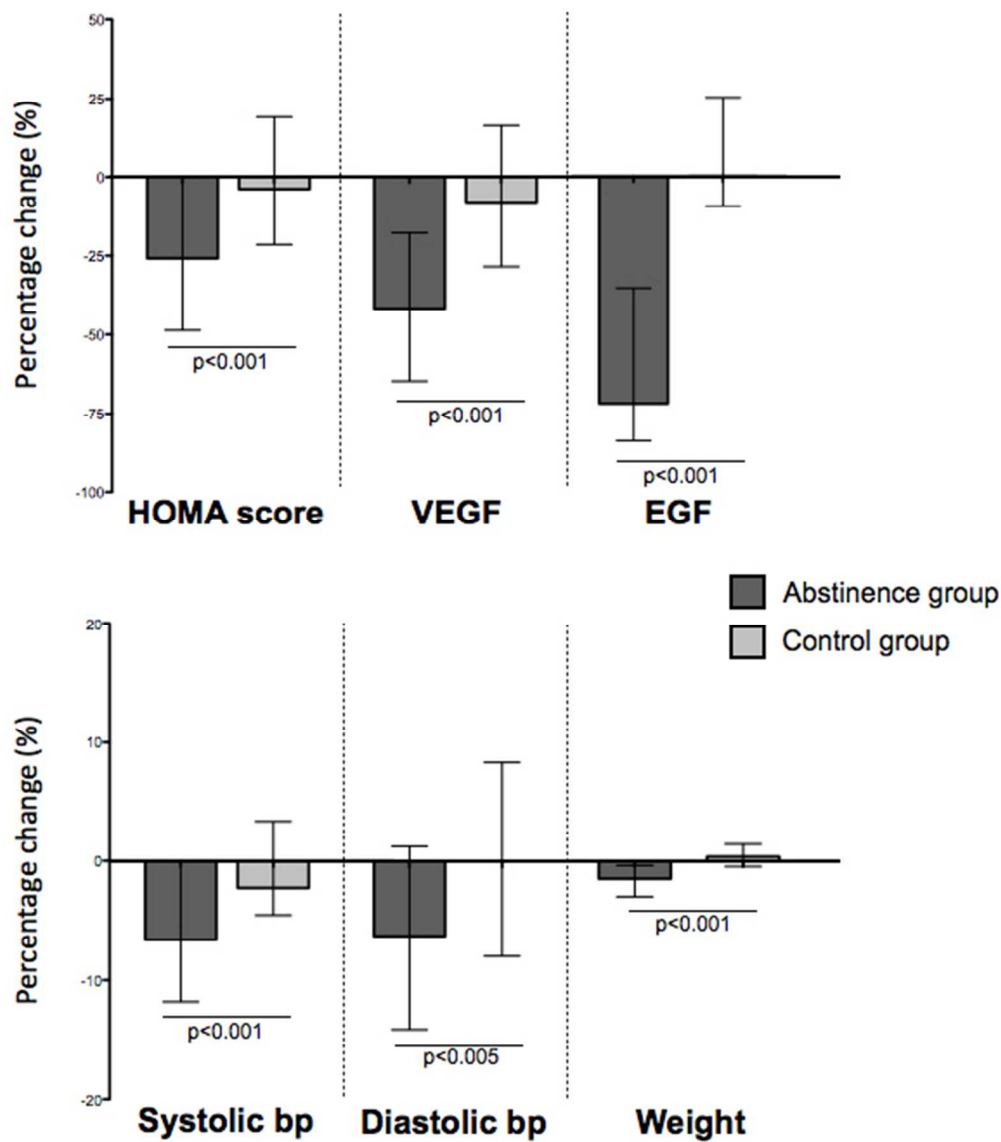

Figure 3: Percentage change from baseline in HOMA score, VEGF, EGF, systolic bp, diastolic bp and weight in abstinence (dark bar) and control (light bar) groups.

Data are presented as median (IQR). Changes from baseline in abstinence and control groups were compared with Mann Whitney test,  $p < 0.01$  taken as level of significance. Abbreviations: HOMA, homeostatic model assessment; VEGF, vascular endothelial growth factor; EGF, epidermal growth factor; bp, blood pressure.

48x56mm (300 x 300 DPI)

Supplemental Table 1a: Change from baseline in biological variables between categories of change in SLIQ DIET score (better / same / worse) in the abstinence group.

|                                                                         |                          | Categorical change from baseline in DIET score<br>in Abstinence Group |                          |                           | p-value <sup>a</sup> |
|-------------------------------------------------------------------------|--------------------------|-----------------------------------------------------------------------|--------------------------|---------------------------|----------------------|
|                                                                         |                          | Better (n=42) <sup>b</sup>                                            | Same (n=16) <sup>b</sup> | Worse (n=32) <sup>b</sup> |                      |
| Change from<br>baseline in<br>biological variable<br>[% , median (IQR)] | HOMA                     | -14.1 (-42.6 to -0.6)                                                 | -33.7 (-48.9 to +1.7)    | -34.9 (-53.1 to -1.7)     | p=0.45               |
|                                                                         | Systolic blood pressure  | -6.6 (-13.3 to -1.4)                                                  | -6.9 (-11.8 to +3.5)     | -6.8 (13.8 to +2.5)       | p=0.83               |
|                                                                         | Diastolic blood pressure | -7.3 (-15.1 to +1.3)                                                  | -5.6 (-16.1 to +5.5)     | -5.9 (-12.5 to +1.2)      | p=0.71               |
|                                                                         | Weight                   | -1.5 (-2.8 to 0.0)                                                    | -1.1 (-2.8 to +0.4)      | -1.4 (-3.0 to -0.3)       | p=0.95               |
|                                                                         | VEGF                     | -36.2 (-63.6 to -10.1)                                                | -57.5 (-73.9 to -30.1)   | -50.0 (-75.5 to -23.7)    | p=0.15               |
|                                                                         | EGF                      | -73.0 (-85.9 to -31.8)                                                | -75.8 (-91.2 to -54.3)   | -76.7 (-88.5 to -37.5)    | p=0.54               |
|                                                                         | Cholesterol              | -9.2 (-16.7 to +3.5)                                                  | -17.3 (-25.0 to -13.6)   | -14.0 (-17.1 to -7.6)     | p=0.01               |
|                                                                         | LDL                      | -5.1 (-19.2 to +16.8)                                                 | -18.4 (-25.8 to -8.8)    | -12.2 (-18.4 to -3.8)     | p=0.02               |
|                                                                         | HDL                      | -15.4 (-23.0 to -5.8)                                                 | -18.9 (25.5 to -7.8)     | -21.0 (-29.7 to -10.9)    | p=0.26               |
|                                                                         | Triglycerides            | -5.1 (-27.2 to +23.0)                                                 | -19.9 (-33.4 to -2.1)    | +1.2 (-13.6 to +24.8)     | p=0.03               |



Supplemental Table 1b: Change from baseline in biological variables between categories of change in SLIQ EXERCISE score (better / same / worse) in the abstinence group.

|                                                                |                          | Categorical change from baseline in EXERCISE score in Abstinence Group |                          |                           | p-value <sup>a</sup> |
|----------------------------------------------------------------|--------------------------|------------------------------------------------------------------------|--------------------------|---------------------------|----------------------|
|                                                                |                          | Better (n=42) <sup>b</sup>                                             | Same (n=16) <sup>b</sup> | Worse (n=32) <sup>b</sup> |                      |
| Change from baseline in biological variable [% , median (IQR)] | HOMA                     | -12.2 (-45.1 to +1.8)                                                  | -26.5 (-46.3 to -1.1)    | -38.9 (-56.2 to -8.7)     | p=0.21               |
|                                                                | Systolic blood pressure  | -6.0 (-11.1 to 0.0)                                                    | -2.7 (-12.9 to +4.6)     | -8.0 (15.0 to -3.7)       | p=0.36               |
|                                                                | Diastolic blood pressure | -4.2 (-13.9 to +1.3)                                                   | -3.9 (-13.6 to +7.9)     | -8.5 (-14.9 to +0.3)      | p=0.31               |
|                                                                | Weight                   | -1.7 (-3.1 to -0.4)                                                    | -1.4 (-2.9 to +0.1)      | -1.1 (-2.5 to -0.1)       | p=0.51               |
|                                                                | VEGF                     | -28.5 (-53.2 to -10.7)                                                 | -57.4 (-75.4 to -34.4)   | -55.5 (-68.6 to -20.2)    | p=0.11               |
|                                                                | EGF                      | -74.9 (-88.5 to -32.7)                                                 | -75.0 (-91.2 to -38.2)   | -71.4 (-82.4 to -41.4)    | p=0.67               |
|                                                                | Cholesterol              | -13.7 (-18.5 to -3.2)                                                  | -12.6 (-20.1 to -4.5)    | -14.1 (-17.7 to -2.7)     | p=0.93               |
|                                                                | LDL                      | -10.8 (-18.9 to +1.9)                                                  | -10.2 (-21.0 to +5.4)    | -8.7 (-22.3 to +8.6)      | p=0.99               |
|                                                                | HDL                      | -16.7 (-25.3 to -7.6)                                                  | -16.2 (26.6 to -8.3)     | -18.3 (-25.7 to -6.9)     | p=0.97               |
|                                                                | Triglycerides            | -14.6 (-31.1 to +15.3)                                                 | -4.4 (-15.9 to +49.2)    | +4.7 (-16.7 to +14.4)     | p=0.43               |

Abbreviations: SLIQ, simple lifestyle indicator questionnaire; HOMA, homeostatic model assessment; VEGF, vascular endothelial growth factor; EGF, epidermal growth factor; LDL, low density lipoprotein; HDL, high density lipoprotein; bp, blood pressure.

a. Participants were graded as better, same or worse based on changes in SLIQ diet score (supplemental table 1a) and exercise score (supplemental table 1b). Data for changes in cigarette smoking is not shown – only 5 individuals had a change from baseline score in the abstinence cohort. Changes from baseline in the abstinence cohort in biological variables were compared between the better / same / worse groups using the Kruskal-Wallis test. P<0.01 was considered significant to account for multiple comparisons.

Complete baseline and one-month lifestyle questionnaire data was available on 90 participants in the abstinence cohort. The number of paired values analysed for each variable are: HOMA n=82; systolic bp n=89; diastolic bp n=89; weight n=85; VEGF n=78; EGF n=78; cholesterol n=84; LDL n=84; HDL n=84; triglycerides n=8.

## STROBE Statement—checklist of items that should be included in reports of observational studies

|                          | Item No | Recommendation                                                                                                                                                                                                                                                                                                                                                                                                                                                         | Completed (page no.) |
|--------------------------|---------|------------------------------------------------------------------------------------------------------------------------------------------------------------------------------------------------------------------------------------------------------------------------------------------------------------------------------------------------------------------------------------------------------------------------------------------------------------------------|----------------------|
| Title and abstract       | 1       | (a) Indicate the study's design with a commonly used term in the title or the abstract                                                                                                                                                                                                                                                                                                                                                                                 | Yes (2)              |
|                          |         | (b) Provide in the abstract an informative and balanced summary of what was done and what was found                                                                                                                                                                                                                                                                                                                                                                    | Yes (2)              |
| Background/rationale     | 2       | Explain the scientific background and rationale for the investigation being reported                                                                                                                                                                                                                                                                                                                                                                                   | Yes (4)              |
| Objectives               | 3       | State specific objectives, including any prespecified hypotheses                                                                                                                                                                                                                                                                                                                                                                                                       | Yes (4,5)            |
| Study design             | 4       | Present key elements of study design early in the paper                                                                                                                                                                                                                                                                                                                                                                                                                | Yes (5)              |
| Setting                  | 5       | Describe the setting, locations, and relevant dates, including periods of recruitment, exposure, follow-up, and data collection                                                                                                                                                                                                                                                                                                                                        | Yes (5,6)            |
| Participants             | 6       | (a) <i>Cohort study</i> —Give the eligibility criteria, and the sources and methods of selection of participants. Describe methods of follow-up<br><i>Case-control study</i> —Give the eligibility criteria, and the sources and methods of case ascertainment and control selection. Give the rationale for the choice of cases and controls<br><i>Cross-sectional study</i> —Give the eligibility criteria, and the sources and methods of selection of participants | Yes (5,6)            |
|                          |         | (b) <i>Cohort study</i> —For matched studies, give matching criteria and number of exposed and unexposed<br><i>Case-control study</i> —For matched studies, give matching criteria and the number of controls per case                                                                                                                                                                                                                                                 | n/a                  |
| Variables                | 7       | Clearly define all outcomes, exposures, predictors, potential confounders, and effect modifiers. Give diagnostic criteria, if applicable                                                                                                                                                                                                                                                                                                                               | Yes (5,6)            |
| Data sources/measurement | 8*      | For each variable of interest, give sources of data and details of methods of assessment (measurement). Describe comparability of assessment methods if there is more than one group                                                                                                                                                                                                                                                                                   | Yes (5,6)            |
| Bias                     | 9       | Describe any efforts to address potential sources of bias                                                                                                                                                                                                                                                                                                                                                                                                              | Yes (5,6)            |
| Study size               | 10      | Explain how the study size was arrived at                                                                                                                                                                                                                                                                                                                                                                                                                              | Yes (6)              |
| Quantitative variables   | 11      | Explain how quantitative variables were handled in the analyses. If applicable, describe which groupings were chosen and why                                                                                                                                                                                                                                                                                                                                           | Yes (6)              |
| Statistical methods      | 12      | (a) Describe all statistical methods, including those used to control for confounding                                                                                                                                                                                                                                                                                                                                                                                  | Yes (6)              |
|                          |         | (b) Describe any methods used to examine subgroups and interactions                                                                                                                                                                                                                                                                                                                                                                                                    | Yes (6)              |
|                          |         | (c) Explain how missing data were addressed                                                                                                                                                                                                                                                                                                                                                                                                                            | Yes (6)              |
|                          |         | (d) <i>Cohort study</i> —If applicable, explain how loss to follow-up was addressed<br><i>Case-control study</i> —If applicable, explain how matching of cases and controls was addressed                                                                                                                                                                                                                                                                              | Yes (6)              |

|                  |     |                                                                                                                                                                                                              |                                       |
|------------------|-----|--------------------------------------------------------------------------------------------------------------------------------------------------------------------------------------------------------------|---------------------------------------|
|                  |     | <i>Cross-sectional study</i> —If applicable, describe analytical methods taking account of sampling strategy                                                                                                 |                                       |
|                  |     | (e) Describe any sensitivity analyses                                                                                                                                                                        | n/a                                   |
| Participants     | 13* | (a) Report numbers of individuals at each stage of study—eg numbers potentially eligible, examined for eligibility, confirmed eligible, included in the study, completing follow-up, and analysed            | Yes (7)                               |
|                  |     | (b) Give reasons for non-participation at each stage                                                                                                                                                         | Yes (7)                               |
|                  |     | (c) Consider use of a flow diagram                                                                                                                                                                           | Yes (figure 1)                        |
| Descriptive data | 14* | (a) Give characteristics of study participants (eg demographic, clinical, social) and information on exposures and potential confounders                                                                     | Yes (7, table 1, supplemental tables) |
|                  |     | (b) Indicate number of participants with missing data for each variable of interest                                                                                                                          | Yes (table 1)                         |
|                  |     | (c) <i>Cohort study</i> —Summarise follow-up time (eg, average and total amount)                                                                                                                             | Yes (7-10)                            |
| Outcome data     | 15* | <i>Cohort study</i> —Report numbers of outcome events or summary measures over time                                                                                                                          | Yes (7-10)                            |
|                  |     | <i>Case-control study</i> —Report numbers in each exposure category, or summary measures of exposure                                                                                                         | n/a                                   |
|                  |     | <i>Cross-sectional study</i> —Report numbers of outcome events or summary measures                                                                                                                           | n/a                                   |
| Main results     | 16  | (a) Give unadjusted estimates and, if applicable, confounder-adjusted estimates and their precision (eg, 95% confidence interval). Make clear which confounders were adjusted for and why they were included | Yes (7-10)                            |
|                  |     | (b) Report category boundaries when continuous variables were categorized                                                                                                                                    | Yes (7-10)                            |
|                  |     | (c) If relevant, consider translating estimates of relative risk into absolute risk for a meaningful time period                                                                                             | n/a                                   |
| Other analyses   | 17  | Report other analyses done—eg analyses of subgroups and interactions, and sensitivity analyses                                                                                                               | Yes (7-10)                            |
| Key results      | 18  | Summarise key results with reference to study objectives                                                                                                                                                     | Yes (7,8)                             |
| Limitations      | 19  | Discuss limitations of the study, taking into account sources of potential bias or imprecision. Discuss both direction and magnitude of any potential bias                                                   | Yes (11)                              |
| Interpretation   | 20  | Give a cautious overall interpretation of results considering objectives, limitations, multiplicity of analyses, results from similar studies, and other relevant evidence                                   | Yes (11)                              |
| Generalisability | 21  | Discuss the generalisability (external validity) of the study results                                                                                                                                        | Yes (11)                              |
| Funding          | 22  | Give the source of funding and the role of the funders for the present study and, if applicable, for the original study on which the present article is based                                                | Yes (16)                              |

1  
2 \*Give information separately for cases and controls in case-control studies and, if applicable, for exposed and  
3 unexposed groups in cohort and cross-sectional studies.  
4

5 **Note:** An Explanation and Elaboration article discusses each checklist item and gives methodological background and  
6 published examples of transparent reporting. The STROBE checklist is best used in conjunction with this article (freely  
7 available on the Web sites of PLoS Medicine at <http://www.plosmedicine.org/>, Annals of Internal Medicine at  
8 <http://www.annals.org/>, and Epidemiology at <http://www.epidem.com/>). Information on the STROBE Initiative is  
9 available at [www.strobe-statement.org](http://www.strobe-statement.org).  
10  
11  
12  
13  
14  
15  
16  
17  
18  
19  
20  
21  
22  
23  
24  
25  
26  
27  
28  
29  
30  
31  
32  
33  
34  
35  
36  
37  
38  
39  
40  
41  
42  
43  
44  
45  
46  
47  
48  
49  
50  
51  
52  
53  
54  
55  
56  
57  
58  
59  
60
